# Supplementary material
Source: publisher figshare collection journal article supplement (https://gsajournals.figshare.com/ndownloader/files/13216346)
Supplement: Supplementary file 1 [file 13216346]

## Sheet: Ws2 x C24 SNPs
	1	2	3	4	5	6	7	8	9	10	11	12	13	14	15	16	17	18	19	21	22	23	24	25	26	27	28	29	31	32	33	34	35	36	37	38	39	40	41	42	43	44	45	46	47	48	49	50	51
1_164969	0	0	2	2	0	2	0	0	0	0	0	0	0	2	2	2	2	0	2	0	0	0	0	0	0	0	0	0	0	0	0	0	0	0	0	0	0	0	0	0	0	0	0	0	0	0	0	0	0
1_589028	0	0	2	2	2	2	0	0	2	2	0	2	2	2	2	2	2	0	2	0	0	0	0	0	0	0	0	0	0	0	0	0	0	0	0	0	0	0	0	0	0	0	2	0	0	0	0	0	0
1_1558412	0	0	2	2	2	2	0	0	2	2	0	2	2	0	2	2	2	0	2	0	0	0	0	0	0	0	0	0	0	0	0	0	0	0	0	0	0	0	0	0	0	0	2	0	0	0	0	0	0
1_2236225	0	0	2	2	2	2	0	0	2	2	0	2	2	0	2	2	2	0	2	0	0	0	0	0	0	0	0	0	0	0	0	0	0	0	0	0	0	0	0	0	0	0	2	0	2	0	0	0	0
1_2987917	0	0	2	2	2	2	0	0	2	2	0	2	2	0	2	2	2	0	2	0	0	0	0	0	0	0	0	0	0	0	0	0	0	0	0	0	0	0	0	0	0	0	2	0	2	0	0	0	0
1_3946860	0	0	2	2	2	2	2	0	2	2	0	2	2	0	2	2	2	0	2	0	0	0	0	0	0	0	0	0	0	0	0	0	0	0	0	0	2	2	0	2	2	0	2	0	2	0	0	0	0
1_4272858	0	0	2	2	2	2	2	0	2	2	0	2	2	0	2	2	2	0	2	0	0	0	0	0	0	0	0	0	0	0	0	0	0	0	0	0	0	2	2	2	2	0	2	0	2	0	0	0	0
1_5562668	0	0	2	2	2	2	2	0	2	2	0	0	2	0	2	2	2	0	2	0	0	0	0	0	0	0	0	0	0	0	0	0	0	0	0	1	0	2	2	2	2	0	2	0	2	0	0	0	0
1_6780203	0	0	2	2	2	2	2	0	2	2	0	0	2	0	2	2	2	0	2	0	0	0	0	0	0	0	0	0	0	0	0	0	0	0	0	2	0	2	2	2	2	0	2	0	2	2	0	0	0
1_7277186	0	0	2	2	2	2	2	0	2	2	0	0	2	0	2	2	2	0	2	0	0	0	0	0	0	0	0	0	0	0	0	0	0	0	0	2	0	2	2	0	2	0	2	0	2	2	0	0	0
1_7669362	0	0	2	2	2	2	2	0	2	2	0	0	0	0	2	2	2	0	2	0	0	0	0	0	0	0	0	0	0	0	0	0	0	0	0	2	0	2	2	0	2	0	2	0	2	2	0	0	0
1_7835179	0	0	2	2	2	2	2	0	2	2	0	1	0	0	2	2	2	0	2	2	0	0	0	0	0	0	0	0	0	0	0	0	0	0	0	2	0	2	2	0	2	0	2	0	2	2	0	0	0
1_8323552	0	0	2	2	2	2	2	0	2	2	0	1	0	0	2	2	2	0	2	2	0	0	0	0	0	0	0	0	0	0	0	2	0	2	0	2	0	2	2	0	2	0	2	2	2	2	0	2	0
1_8948812	0	0	2	2	2	0	2	0	2	2	0	2	0	0	2	2	2	0	2	2	0	0	0	0	0	0	0	0	0	0	0	2	0	2	0	2	0	2	2	0	2	0	2	2	2	2	0	2	0
1_10925555	0	0	0	2	2	0	0	0	2	2	0	2	0	0	2	2	2	0	0	2	0	2	2	0	2	0	2	2	0	0	0	2	0	2	2	2	0	2	2	0	2	0	2	2	0	2	0	2	0
1_12503213	0	0	2	2	2	0	0	0	2	2	0	2	0	0	2	2	2	0	0	2	0	2	2	0	0	0	2	2	0	0	0	0	0	2	2	2	0	0	2	0	2	0	2	2	0	2	0	2	0
1_12931104	2	0	2	2	2	0	0	0	2	2	0	2	0	0	2	0	2	0	0	2	2	2	2	0	0	0	2	2	0	0	0	0	0	2	2	2	0	0	2	0	2	2	2	2	0	2	0	2	0
1_13297794	0	0	0	0	0	0	0	0	2	2	0	2	0	0	2	0	0	0	0	2	2	2	2	0	0	0	2	2	0	0	0	0	0	2	2	2	2	0	2	0	2	2	2	2	0	2	0	2	0
1_17321579	0	0	0	0	0	0	0	0	2	2	0	2	2	0	0	0	0	0	0	2	2	2	2	2	0	0	2	2	0	0	2	0	0	2	2	2	2	0	2	0	2	0	0	0	0	0	0	0	0
1_18376582	0	0	0	0	0	0	0	0	2	2	0	2	2	0	0	0	0	0	0	2	2	2	2	2	0	0	2	2	0	0	2	0	0	2	2	2	2	0	2	0	2	0	0	0	0	0	0	0	0
1_19287008	0	0	0	0	0	0	0	0	2	2	0	2	2	0	0	0	0	0	0	2	2	2	2	2	0	2	2	2	0	0	2	0	0	2	2	2	2	2	2	0	2	0	0	0	0	0	0	0	0
1_20707807	0	0	0	0	0	0	0	0	2	2	0	2	2	0	0	0	0	0	0	2	2	2	2	2	0	2	2	2	2	0	2	0	0	2	2	2	2	0	2	0	2	0	0	0	0	0	0	0	0
1_22248127	0	0	0	0	0	0	0	0	2	0	0	2	2	0	0	0	0	0	0	2	2	2	2	2	0	2	2	2	2	0	2	0	0	0	2	2	2	0	2	0	2	0	0	0	0	0	0	0	0
1_22586487	0	0	0	0	0	0	0	0	2	0	0	2	2	0	0	0	0	0	0	2	2	2	2	2	0	2	2	2	2	0	2	0	0	0	2	2	2	0	2	0	2	0	0	0	0	0	0	0	0
1_23395084	0	0	0	0	0	0	0	0	2	0	2	2	2	0	0	0	0	0	0	2	2	2	2	2	0	2	2	2	2	0	2	0	0	0	2	2	2	0	2	0	2	0	0	0	0	0	0	0	0
1_23815508	0	0	0	0	0	0	0	0	2	0	2	2	2	0	0	0	0	0	0	2	2	2	2	2	0	2	2	2	2	0	2	0	0	0	2	2	2	0	2	0	2	0	0	0	0	0	0	0	0
1_24467238	0	0	0	0	0	0	0	0	2	0	2	2	2	0	0	0	0	0	0	2	2	2	2	2	0	2	2	2	2	0	2	0	2	0	2	2	2	0	2	0	2	0	0	0	0	0	0	0	0
1_24749254	2	2	0	2	2	0	0	0	2	0	2	2	2	0	0	0	0	0	0	2	2	2	2	2	0	2	2	2	2	0	2	0	2	0	2	2	2	0	2	0	2	0	0	0	0	0	0	0	0
1_24839267	2	2	0	2	2	0	2	0	2	0	2	2	2	0	0	0	0	0	0	2	2	2	2	2	0	2	2	2	2	0	2	0	2	0	2	2	2	0	2	0	2	0	0	0	0	0	0	0	0
1_25388659	2	2	0	2	2	0	2	0	2	0	2	2	2	0	0	0	0	0	0	2	2	2	2	2	0	2	2	2	0	0	0	0	2	0	2	2	2	0	2	0	2	0	0	0	0	0	0	0	0
1_25800659	2	2	0	2	2	0	2	0	2	0	2	2	0	0	0	0	0	0	0	2	2	2	2	2	0	2	2	2	2	0	0	0	2	0	2	2	2	0	0	0	2	0	0	0	0	0	0	0	0
1_26130541	2	2	2	2	2	0	2	0	2	0	2	2	0	0	0	0	0	0	0	2	2	2	2	2	0	2	2	2	2	0	0	0	2	0	2	2	2	0	0	0	2	0	0	0	0	0	0	0	0
1_26550969	2	2	2	2	2	0	1	0	2	0	2	2	0	0	0	0	0	0	0	2	2	2	2	2	0	2	2	2	2	0	0	0	2	0	2	2	0	0	0	0	2	0	0	0	0	0	0	0	0
1_27046266	2	2	2	2	2	0	0	0	2	0	2	2	0	0	0	0	0	0	0	2	2	2	2	2	0	2	2	2	2	0	0	0	2	0	2	2	0	0	0	0	2	0	0	0	0	0	0	0	0
1_27500343	2	2	0	2	2	0	0	0	2	0	2	2	0	0	0	0	0	0	0	0	2	2	2	2	0	2	2	2	2	0	0	0	2	0	2	2	0	0	0	0	2	0	0	0	0	0	0	0	0
1_28297681	2	2	0	2	2	0	0	0	2	0	2	2	0	0	0	0	0	0	0	0	2	2	2	2	0	2	2	2	0	0	0	0	0	0	0	2	0	0	0	0	2	0	0	0	0	0	0	0	0
1_29210656	2	2	0	2	2	2	0	0	2	0	2	2	0	0	0	0	0	0	0	0	2	2	2	2	0	2	2	0	0	0	0	0	0	0	0	2	0	0	0	0	2	0	0	0	0	0	0	0	0
1_29365602	2	2	0	2	2	2	0	0	2	0	2	2	0	0	0	0	0	0	0	0	2	2	2	2	0	2	2	0	0	0	0	0	0	0	0	2	0	0	0	0	2	0	0	0	0	0	0	0	0
1_29472649	2	0	0	2	2	1	0	0	2	1	2	2	0	1	0	1	0	1	0	0	2	2	1	2	0	2	2	0	0	0	0	0	0	0	0	1	0	1	0	0	2	0	0	0	0	0	0	0	0
2_133174	2	2	2	2	0	0	0	0	0	0	0	0	0	2	0	2	2	0	2	0	0	0	0	0	2	2	0	2	0	0	1	0	0	0	0	1	0	0	1	0	0	1	0	0	0	0	1	0	0
2_1560090	0	2	2	2	0	1	0	0	0	0	0	0	0	2	0	0	2	0	2	0	0	0	0	0	2	2	0	2	0	0	0	0	0	0	0	0	0	0	0	0	0	0	0	0	0	0	0	0	0
2_6518129	0	2	2	2	0	2	0	0	0	0	0	0	0	2	0	0	2	0	2	0	0	0	0	0	2	2	2	2	0	0	0	0	0	0	0	0	0	0	0	0	0	0	0	0	0	0	0	0	0
2_9095046	0	2	2	2	0	2	0	0	0	0	0	0	0	2	0	0	2	0	2	0	0	0	0	0	2	0	2	0	0	0	0	0	0	0	0	0	0	0	0	0	0	0	0	0	0	2	0	0	2
2_9661488	0	2	2	2	0	2	0	0	0	0	0	0	0	2	0	0	2	0	2	0	0	0	0	0	2	0	2	0	0	0	0	0	0	0	0	0	0	0	0	0	0	0	0	0	0	2	0	0	2
2_9798215	0	2	2	2	0	2	0	0	0	0	0	0	0	2	0	0	2	0	2	0	0	0	0	0	2	0	2	0	0	0	0	0	0	0	0	0	0	0	0	0	0	0	0	0	0	2	0	0	2
2_9981557	0	2	2	2	0	2	0	0	0	0	0	0	0	2	0	0	2	0	2	0	0	0	0	0	0	0	2	0	0	0	0	0	0	0	0	0	0	0	0	0	0	0	0	0	0	2	0	0	2
2_10563487	0	2	2	2	0	2	0	0	0	0	0	0	0	2	0	0	2	0	2	0	0	0	0	0	0	0	2	0	0	0	0	0	0	0	0	0	0	0	0	0	0	0	0	0	0	2	0	0	2
2_11074551	0	2	2	2	0	2	0	0	0	0	0	0	0	2	0	0	2	0	2	0	0	0	0	0	0	0	2	0	0	0	0	0	0	0	0	0	0	0	0	0	0	0	0	0	0	2	0	0	2
2_12103341	0	2	2	2	0	2	0	0	0	0	0	0	0	2	0	0	2	0	2	0	0	0	0	0	1	0	2	0	0	0	0	0	0	0	0	0	0	0	0	0	0	0	0	0	0	2	0	0	2
2_12285634	0	2	2	2	0	2	0	0	0	0	0	0	0	2	0	0	2	0	2	0	0	0	0	0	1	0	2	0	0	0	0	0	0	0	0	0	0	0	0	0	0	0	0	0	0	2	0	0	2
2_13125572	0	2	2	2	0	2	0	0	0	0	0	0	0	2	0	0	0	0	2	0	0	0	0	0	2	0	2	0	0	0	0	0	0	0	0	0	0	0	0	0	0	0	0	0	0	2	0	0	2
2_14500577	0	2	2	2	0	2	0	0	0	0	0	0	0	2	0	0	2	0	2	0	0	0	0	0	2	0	2	0	0	0	0	0	0	0	0	0	0	0	0	0	0	0	0	0	0	2	2	0	2
2_15447913	0	2	2	2	0	2	0	0	0	0	0	0	0	2	0	0	0	0	2	0	0	0	0	0	2	0	2	0	0	0	0	0	0	0	0	0	0	0	0	0	0	0	0	0	0	2	2	0	2
2_15988888	0	2	2	2	0	2	0	2	2	0	0	0	2	2	0	0	0	2	2	0	0	0	0	0	2	0	2	0	0	0	0	0	0	0	0	0	0	0	0	0	0	0	0	0	0	2	2	0	2
2_16385811	0	2	2	2	0	2	0	2	0	0	0	0	2	2	0	0	0	2	2	2	0	0	0	0	2	0	2	0	0	0	0	0	0	0	0	0	0	0	0	0	0	0	0	0	0	2	2	0	2
2_16683138	0	2	2	2	0	2	0	2	0	0	0	0	2	2	0	0	0	2	2	2	0	0	0	0	2	0	2	0	0	0	0	0	0	0	0	0	0	0	0	0	0	0	0	0	0	2	2	0	2
2_16811161	0	2	2	2	0	2	0	2	0	0	0	0	2	2	0	0	2	2	2	2	0	0	0	0	2	0	2	0	0	0	0	0	0	0	0	0	0	0	0	0	0	0	0	0	0	2	2	0	2
2_17757095	0	2	2	2	0	2	0	0	0	0	0	1	2	2	0	0	2	0	2	2	0	0	0	0	2	0	2	0	0	0	0	0	0	0	0	0	0	0	0	0	0	0	0	0	0	0	0	0	0
2_18048909	0	2	2	2	0	2	0	0	0	0	0	2	2	2	0	0	2	0	2	2	2	0	0	0	2	0	2	0	0	0	0	0	0	0	0	0	0	0	0	0	0	0	0	0	0	0	0	0	0
2_19113533	0	2	2	0	0	2	0	0	0	1	0	0	2	2	2	0	2	0	2	0	0	0	0	0	2	0	2	0	0	0	0	0	0	0	0	0	0	0	1	0	0	0	0	0	0	0	0	0	0
3_302599	2	0	2	2	2	2	2	2	2	2	2	0	1	0	0	0	0	2	0	0	2	2	0	0	2	2	0	2	2	2	0	0	2	2	2	1	2	0	0	2	2	0	0	0	0	0	0	0	0
3_1805703	0	2	0	0	0	0	0	0	0	0	0	2	0	2	2	2	2	0	2	2	0	0	2	0	0	0	2	0	0	0	0	2	0	0	0	0	0	0	0	0	0	0	0	0	0	0	0	2	0
3_2229641	0	2	0	0	0	0	0	0	0	0	0	2	0	2	2	0	0	0	2	2	0	0	2	0	0	0	2	0	0	0	0	2	0	0	0	0	0	0	0	0	0	0	0	0	0	0	0	2	0
3_3044573	0	2	0	0	0	0	0	0	0	0	0	2	0	2	1	0	0	0	2	2	0	0	2	0	0	0	2	0	0	0	0	2	0	0	0	0	0	0	0	0	0	1	0	0	0	0	0	0	0
3_3407220	0	2	0	0	0	0	0	0	0	0	0	2	0	2	1	0	0	0	2	2	0	0	2	0	0	0	2	0	0	0	0	0	0	0	0	0	0	0	0	0	0	2	0	0	0	0	0	0	0
3_5551187	0	0	0	0	0	0	0	0	0	0	0	2	0	2	1	0	0	0	0	2	0	0	0	0	0	0	2	0	0	0	0	0	0	0	0	0	0	0	0	0	0	0	0	0	0	0	0	0	0
3_6123107	0	0	0	0	0	0	0	0	0	0	0	2	0	0	1	0	0	0	0	2	0	0	0	0	0	0	2	0	0	0	0	0	0	0	0	0	0	0	0	0	0	0	0	0	0	0	0	0	0
3_7698365	0	0	0	0	0	0	0	0	0	0	0	2	0	0	0	0	0	0	0	1	0	0	0	0	0	0	0	0	0	0	0	0	0	0	0	0	0	0	0	0	0	0	0	0	0	0	0	0	0
3_8478243	0	0	0	0	0	0	0	0	0	2	0	2	0	0	0	0	0	0	0	0	0	2	0	2	0	0	0	0	0	0	0	0	0	0	0	0	0	0	0	0	0	2	0	0	0	0	0	0	0
3_8880778	0	0	0	0	0	0	0	0	0	0	0	2	0	0	0	0	0	0	0	0	0	2	0	2	0	0	0	0	2	0	0	0	0	0	0	0	0	0	0	0	0	2	0	0	0	0	2	0	0
3_9377864	0	0	0	0	0	0	0	0	0	0	0	2	0	0	0	0	0	0	0	0	0	2	0	2	0	0	0	0	2	0	0	0	0	0	2	1	0	0	0	0	0	2	0	2	0	0	2	0	0
3_10093919	0	0	0	0	0	0	0	0	0	0	2	2	0	2	0	0	0	0	0	0	0	2	0	2	2	0	0	0	2	0	0	0	2	0	2	2	0	0	0	0	0	2	0	2	0	0	2	0	0
3_10746090	0	0	0	0	0	2	0	0	0	0	2	0	2	2	2	0	0	0	2	0	0	2	0	2	2	0	0	0	2	0	0	0	2	0	2	2	0	0	0	0	0	2	2	2	0	0	2	0	0
3_14719936	0	0	0	0	0	2	2	2	0	0	2	0	2	2	2	0	0	0	2	0	0	2	0	2	2	0	0	0	2	2	0	0	2	0	2	2	0	0	0	0	2	2	2	2	0	0	2	0	2
3_15825298	0	0	0	0	0	2	2	2	0	0	2	0	2	2	2	0	0	0	2	0	0	2	0	2	2	0	0	0	2	2	0	0	2	0	2	2	2	0	0	0	2	2	2	2	0	0	2	0	2
3_16514932	2	0	0	2	0	2	2	2	2	0	2	0	2	2	2	0	0	0	2	0	0	2	0	2	2	0	0	0	2	2	2	2	2	0	2	2	2	0	0	0	2	2	2	2	0	0	2	0	1
3_16755037	2	0	0	2	0	2	2	2	0	0	2	0	2	0	2	0	0	0	2	0	0	2	0	2	2	0	2	0	2	2	2	2	2	0	2	2	2	0	0	2	2	2	2	2	0	0	2	0	1
3_16885146	2	0	0	2	0	2	2	2	0	0	2	0	2	0	2	0	0	0	0	0	0	2	0	2	2	0	2	0	2	2	2	2	2	0	2	2	2	0	0	2	2	2	2	2	0	0	2	0	1
3_17093991	2	0	0	2	0	2	2	2	0	0	0	0	2	0	2	0	0	0	0	0	0	2	0	0	2	0	2	0	0	2	2	2	2	0	2	2	2	0	0	2	2	2	2	2	0	0	2	0	1
3_17340330	2	0	0	2	0	2	2	2	0	0	0	0	2	0	2	0	0	0	0	0	0	2	0	0	2	0	2	0	0	2	2	2	2	0	2	2	2	0	0	2	2	2	2	2	0	0	2	0	1
3_17888899	0	2	2	0	2	0	0	0	0	0	0	0	0	2	0	2	2	0	2	2	2	0	2	2	0	2	0	2	2	0	0	0	0	0	0	0	0	2	2	0	0	0	0	0	2	2	0	2	1
3_18651928	0	0	2	0	2	0	0	0	0	0	0	0	0	2	0	2	2	0	2	2	2	0	2	2	0	2	0	2	2	0	0	0	0	0	0	0	0	2	2	0	0	0	0	0	2	2	0	2	2
3_20397187	0	0	2	0	2	0	0	0	0	0	0	0	0	2	2	2	2	0	2	2	2	2	2	2	0	2	2	2	2	0	0	0	0	0	2	1	0	2	0	0	0	0	0	0	2	2	0	2	2
3_21228655	0	0	2	0	2	0	0	0	0	0	0	0	0	2	2	2	0	0	2	2	2	2	2	2	0	2	2	2	2	0	0	2	0	0	2	2	0	2	0	0	0	0	0	0	2	2	0	2	2
3_21938432	0	0	0	0	2	0	0	0	0	0	0	0	0	0	2	2	0	0	2	2	2	2	2	2	0	2	2	2	2	0	0	2	0	0	0	2	0	2	0	0	0	0	0	0	2	2	0	2	2
3_23028820	0	0	0	0	2	0	0	0	0	0	0	0	0	0	2	2	0	0	2	2	2	2	2	2	0	2	2	2	2	0	0	2	0	0	0	0	0	2	0	0	0	0	0	0	2	2	0	2	2
3_23186222	0	0	0	0	2	0	0	0	0	0	0	0	0	0	2	2	0	1	2	2	2	2	2	2	0	2	2	2	2	0	0	2	0	0	0	0	0	2	0	0	0	0	0	0	0	0	0	0	0
3_23437948	0	0	0	0	2	0	0	0	0	0	0	0	0	0	2	2	0	1	2	2	2	2	2	2	0	2	2	2	2	0	0	2	0	0	0	0	0	0	0	0	0	1	0	0	0	0	0	0	0
4_182855	0	0	0	0	0	0	0	0	0	0	0	0	0	0	0	0	0	0	0	0	1	0	0	0	0	1	2	2	0	0	0	0	0	0	0	0	0	0	0	0	0	0	0	0	0	0	0	0	0
4_912774	0	0	0	0	0	0	0	0	0	0	0	0	0	0	0	0	0	0	0	0	2	0	0	0	0	2	2	0	0	0	0	0	0	0	0	0	0	0	0	0	0	0	0	0	0	0	0	0	0
4_3560490	0	0	0	0	0	0	0	0	0	0	0	0	0	0	0	0	0	0	0	0	2	0	0	0	0	0	2	0	0	0	0	0	0	0	0	0	0	0	0	0	0	0	0	0	0	0	0	0	0
4_5833599	0	0	0	0	0	0	0	2	2	0	0	2	0	0	0	0	0	2	0	0	2	0	0	0	0	0	2	0	0	0	0	0	0	0	0	0	0	0	0	0	0	0	0	0	0	0	0	0	0
4_7036044	0	0	0	0	0	0	0	2	2	0	0	2	0	0	0	0	0	2	0	0	2	2	2	0	0	2	0	0	0	0	0	0	0	0	0	0	0	0	0	0	0	0	0	0	0	0	0	0	0
4_7623315	0	0	0	0	0	0	0	2	2	0	0	2	0	0	0	0	0	2	0	0	2	2	2	0	0	2	0	0	0	0	0	0	0	0	0	0	0	0	0	0	0	0	0	0	0	0	0	0	0
4_7971539	0	0	0	0	0	0	0	2	2	0	2	2	2	0	0	0	0	2	0	0	0	2	2	0	0	2	0	0	0	0	0	0	0	0	0	0	0	0	0	0	0	0	0	0	0	0	0	0	0
4_8363868	0	0	0	0	0	0	0	2	2	0	2	2	2	0	0	0	0	2	0	0	0	0	0	0	0	0	0	0	0	0	0	0	0	0	0	0	0	0	0	0	0	0	0	0	0	0	0	0	0
4_9038257	0	0	0	0	0	0	0	2	0	0	2	2	2	0	0	0	0	2	0	0	0	0	0	0	0	0	0	0	0	0	0	0	0	0	0	0	0	0	0	0	0	0	0	0	0	0	0	0	0
4_9390932	0	0	0	0	0	0	0	2	0	0	2	2	2	0	0	0	0	2	0	0	0	0	0	0	0	0	0	0	0	2	0	2	1	0	0	0	0	0	0	0	0	0	0	0	0	0	0	0	0
4_9821914	0	0	0	0	0	0	0	0	0	0	2	2	2	0	0	0	0	1	0	0	0	0	0	0	0	0	0	0	0	2	0	2	1	0	0	0	0	0	0	0	0	0	0	0	0	0	0	0	0
4_10890768	0	0	0	0	0	0	0	0	0	0	2	2	2	0	0	0	0	0	0	0	0	0	0	0	0	0	0	0	0	2	0	2	2	0	0	0	0	0	0	0	0	0	0	0	0	0	0	0	0
4_12126692	0	0	0	0	0	0	0	0	0	0	2	2	2	0	0	0	0	0	0	0	0	0	0	0	0	0	0	0	0	2	0	2	0	0	0	0	0	0	0	0	0	0	0	0	0	0	0	0	0
4_13470070	0	0	0	0	0	0	0	0	0	0	2	2	2	0	0	0	0	0	0	0	0	0	0	0	0	0	0	0	0	0	0	2	0	0	0	0	0	0	0	0	0	0	0	0	0	0	0	0	0
4_14027029	0	0	0	0	0	0	0	0	0	0	2	2	2	0	0	0	0	0	0	0	0	0	0	0	0	0	0	0	0	0	2	2	0	0	0	0	0	0	0	0	0	0	0	0	0	0	0	0	0
4_14144967	0	0	0	0	0	0	0	0	0	0	2	2	2	0	0	0	0	0	0	0	0	0	0	0	0	0	0	0	0	0	2	2	0	0	0	0	0	0	0	0	0	0	0	0	0	0	0	0	0
4_15283818	0	0	0	0	0	0	0	0	0	0	2	2	2	0	0	0	0	0	0	0	0	0	0	0	0	0	0	0	0	0	2	0	0	0	0	0	0	0	0	0	0	0	0	0	0	0	0	0	0
4_16354992	0	0	0	0	0	0	0	0	0	0	2	2	2	0	0	0	0	0	0	0	0	0	0	0	0	0	0	0	0	0	2	0	2	0	0	0	0	0	0	0	0	0	0	0	0	0	0	0	0
4_18150798	0	0	0	0	0	1	0	1	2	0	1	1	2	0	0	0	0	0	0	0	0	0	0	0	0	0	0	0	0	0	2	2	2	0	0	0	0	0	0	0	0	0	0	1	0	0	0	0	0
5_669813	0	2	1	0	0	2	0	2	0	2	0	2	2	2	2	2	0	2	0	0	2	0	2	0	0	2	2	2	0	0	0	0	0	0	0	0	0	0	1	0	0	0	0	0	0	0	0	0	0
5_872351	0	2	2	0	0	2	0	0	0	0	0	0	0	2	2	2	0	0	0	0	2	0	2	0	0	2	2	2	0	0	0	0	0	0	0	0	0	0	0	0	0	0	0	0	0	0	0	0	0
5_1335242	0	2	2	0	2	2	0	0	0	0	0	0	0	2	2	2	0	0	0	0	2	0	2	0	0	2	2	2	0	0	0	0	0	0	0	0	0	0	0	0	0	0	0	0	0	0	0	0	0
5_1477334	0	2	2	0	2	2	0	0	0	0	0	0	0	2	2	2	0	0	0	0	0	0	2	0	0	2	2	2	0	0	0	0	0	0	0	0	0	0	0	0	0	0	0	0	0	0	0	0	0
5_1820572	0	2	2	0	2	2	0	0	0	0	0	0	0	2	2	2	0	0	0	0	0	0	2	0	0	0	2	2	0	0	0	0	0	0	0	0	2	2	2	0	2	0	0	0	0	0	0	0	0
5_2204139	0	2	2	0	2	2	0	0	0	0	0	0	0	2	2	0	0	0	0	0	0	0	2	0	0	0	2	2	0	0	0	0	0	0	0	0	2	2	2	2	2	0	0	0	0	0	0	0	0
5_3549754	0	2	2	0	1	2	0	0	0	0	0	0	0	2	2	0	0	0	0	0	0	0	0	0	0	0	2	2	0	0	0	0	0	0	0	0	2	2	2	2	2	0	0	0	0	0	0	0	0
5_4574027	0	2	2	0	1	2	0	0	0	0	0	0	0	2	2	0	0	0	0	0	0	0	2	2	0	0	2	2	0	0	0	0	0	0	0	0	2	2	2	2	2	0	0	0	0	0	0	0	0
5_4881878	0	2	2	0	1	2	0	0	0	0	0	0	0	2	2	0	0	0	0	0	0	0	2	2	0	0	2	2	0	0	0	0	0	0	0	0	2	2	2	2	2	0	0	0	0	0	0	0	0
5_5034860	0	2	2	0	1	2	0	0	0	0	0	0	0	2	2	0	0	0	0	0	0	2	2	2	0	0	2	2	0	0	0	0	0	0	0	0	2	2	2	2	2	0	0	0	0	0	0	0	0
5_6144400	0	2	2	0	1	0	0	0	0	0	0	0	0	2	2	0	0	0	0	0	0	2	2	2	0	0	2	2	0	0	0	0	0	0	0	0	2	2	2	2	2	0	0	0	0	0	0	0	0
5_6967473	0	2	2	0	1	0	0	0	0	0	0	0	0	2	2	0	0	0	0	0	0	2	2	2	0	0	2	2	0	0	0	0	0	0	0	0	2	2	2	2	2	0	0	0	0	0	0	0	0
5_7159905	0	0	2	0	0	0	0	0	0	0	0	0	0	2	2	0	0	0	0	0	0	2	2	2	0	0	2	2	0	0	0	0	0	0	0	0	2	2	2	2	2	0	0	0	0	0	0	0	0
5_12669559	0	0	2	0	2	0	0	0	0	0	0	0	0	2	2	0	2	0	0	0	0	2	0	2	0	0	2	0	0	0	0	0	0	0	0	0	2	2	0	2	2	0	0	0	0	0	0	0	0
5_13699291	2	0	2	0	2	0	0	0	0	0	0	0	0	2	2	0	2	0	0	0	0	2	0	2	0	0	2	0	0	0	0	0	0	0	0	0	0	0	0	0	0	0	0	0	0	0	0	0	0
5_14707126	2	0	2	0	2	0	0	0	0	0	0	0	0	2	2	0	2	0	0	0	2	0	0	2	0	0	2	0	0	0	0	0	0	0	0	0	0	0	0	0	0	0	0	0	0	1	2	2	2
5_15572367	2	0	2	2	2	0	0	0	0	0	0	0	0	2	2	0	2	0	0	0	2	0	0	2	2	0	0	0	0	0	0	0	0	0	0	0	0	0	0	0	0	0	0	0	0	2	2	2	2
5_15817199	2	0	2	2	2	0	0	0	0	0	0	0	0	2	2	2	2	0	0	2	2	0	0	2	2	0	0	0	0	0	0	0	0	0	0	0	0	0	0	0	0	2	2	0	0	2	2	2	2
5_16544381	2	0	2	2	2	0	0	0	0	0	0	0	0	2	2	2	2	0	0	2	2	0	0	2	2	0	0	0	0	0	0	0	0	0	0	0	0	0	0	0	0	2	2	0	0	2	2	2	2
5_16769469	2	0	2	2	2	0	0	0	0	0	0	0	0	2	2	2	2	0	0	2	2	0	0	2	2	2	2	0	0	0	0	0	0	0	0	0	0	0	0	0	0	2	2	0	0	2	2	2	2
5_17036538	2	0	2	2	2	0	0	0	0	0	0	0	0	2	2	2	2	0	0	2	2	0	0	2	2	2	2	0	0	0	0	0	0	0	0	0	0	0	0	0	0	2	2	0	0	2	2	2	2
5_17692611	2	0	2	2	2	0	0	0	0	0	0	0	0	2	2	2	2	0	0	2	2	0	0	2	2	2	2	0	0	0	0	0	0	0	0	0	0	0	0	0	0	2	2	0	0	0	2	2	2
5_19853685	2	0	2	2	2	0	2	2	2	0	0	2	0	2	2	2	2	2	0	2	2	0	0	2	2	2	2	0	0	0	0	0	0	0	0	0	0	0	0	0	0	2	2	2	0	0	2	2	0
5_21141781	2	0	1	2	2	0	2	2	2	0	0	2	0	2	0	2	2	2	0	2	2	0	0	2	2	2	2	2	0	0	0	0	0	0	0	0	0	0	0	0	0	2	2	2	2	0	2	2	0
5_21872424	0	0	0	0	0	0	0	2	2	2	0	2	0	2	0	2	2	2	2	2	2	2	0	2	2	2	2	2	0	0	0	0	0	0	0	0	0	0	0	0	0	2	2	2	2	2	2	2	0
5_25066934	0	0	0	0	0	0	0	2	0	2	2	2	0	2	2	2	2	2	0	2	2	0	0	2	2	2	2	2	0	0	0	0	0	0	0	0	2	2	2	2	0	2	2	2	2	2	2	2	0
5_26260443	0	0	0	0	0	0	0	2	0	2	2	2	2	2	2	2	2	2	0	2	2	0	0	2	2	2	2	2	0	0	0	0	0	0	0	0	2	2	2	0	0	2	2	2	2	2	2	2	0
5_26728688	0	0	0	0	0	0	0	2	0	2	2	2	2	2	2	2	2	2	0	2	2	0	0	2	2	2	2	2	0	0	0	0	0	0	0	0	2	2	2	0	0	2	2	2	2	2	2	2	0
5_26878319	0	0	0	0	0	0	0	2	0	2	2	2	2	2	2	2	2	2	0	2	2	0	0	2	0	2	2	2	0	0	0	0	0	0	0	0	2	0	2	0	0	2	2	2	2	2	2	2	0
[truncated: 34 more columns]

## Sheet: Ws2 x C24 Traits
RIL	Period_June	Phase_June	Period_July	Phase_July	Period_Sept	Phase_Sept	Cauline_Leaf_Number	Rosette_Leaf_Number	Cauline_Branch_Number	Rosette_Branch_Number	Rosette_Meristem_Fate
1	24.639	14.981	24.2443	15.0272	24.3875	13.8812	3.30893	7.64853	3.27273	7.27273	0.947857
2	24.4204	15.6355	22.959	14.3223	25.3005	15.0049	5.01274	15.209	5.02033	11.8006	0.788969
3	24.129	13.9168	23.7552	13.6235	23.7019	13.3347	3.25451	10.0909	3.29234	8.25653	0.840171
4	24.0119	13.122	23.7099	15.2567	24.283	11.9415	3.89994	8.81818	3.87878	6.63636	0.769228
5	23.6976	12.9511	23.1252	13.456	24.5959	13.2065	4.18853	13.2034	4.29094	10.2727	0.698622
6	24.67	15.0668	24.417	15.8178	23.0078	11.9434	5.79389	22.3666	5.63636	15.0909	0.764373
7	24.6368	13.9992	24.85	16.4195	25.753	14.5519	3.83729	9	3.90563	7.72727	0.876397
8	24.035	13.3067	24.7208	16.3328	25.4155	15.0698	2.20189	7.63636	2.27273	6.18182	0.805736
9	24.169	13.3541	24.0225	15.127	23.6041	13.0364	3.53566	11.2727	3.49698	9.31355	0.838082
10	24.1641	13.0792	25.3782	16.8645	24.4459	13.0968	3.35835	8.86265	3.17212	7.17457	0.836626
11	24.5725	14.7865	24.8463	16.9398	23.2063	12.8786	3.29497	8.36364	3.27273	6.81818	0.825541
12	.	.	.	.	.	.	.	.	.	.	.
13	24.0662	14.6512	24.2783	15.4878	24.1465	14.7137	2.51854	9.8146	2.46819	9.90058	0.886267
14	24.0963	12.6354	24.7764	15.9313	25.1452	13.7496	2.96807	8.87505	3.01206	6.50058	1
15	24.46	13.4411	.	.	24.8919	13.0815	.	.	.	.	.
16	24.3487	13.7553	24.3296	14.8084	25.546	13.9246	3.02873	9	3.01774	5.45455	0.600518
17	23.4225	12.5732	23.7158	13.9214	25.1488	13.8726	3.1901	7.90909	3.18182	6.45455	0.831133
18	24.2937	14.5739	24.3113	16.0596	25.2104	13.6641	3.08083	7.36364	3.13034	6.18182	0.827092
19	24.3175	13.7103	23.2437	14.255	23.6361	13.7093	2.4896	8.45455	2.46374	6.25653	0.75369
21	23.5609	12.7586	24.5058	15.2485	24.3405	12.5819	3.02572	8.14853	3.12033	6.80058	0.852976
22	23.485	12.1658	23.6317	14.5756	23.0902	12.2949	2.25956	6.45455	2.23122	5.63127	0.879358
23	24.1038	13.6415	23.8927	14.7071	24.3674	12.8275	2.21337	7.63636	2.18182	7.90909	1
24	24.1938	13.4062	24.3775	15.2724	22.6217	12.8674	3.43956	11.2727	3.45455	7.72727	0.702283
25	24.0237	13.1421	23.1055	12.8568	23.9329	12.2245	2.17313	8.85411	2.20563	6.07471	0.6751
26	24.0388	13.448	24.1221	15.4337	23.625	12.6429	2.67179	6.98522	2.72033	6.00058	0.85405
27	.	.	.	.	.	.	.	.	.	.	.
28	24.1	13.5847	24.4852	16.8593	22.2775	12.4963	2.70514	4.90909	2.63636	4.72727	0.95303
29	24.4462	13.7184	22.8365	13.2475	22.9308	11.4368	2.59613	6.04007	2.527	5.3934	0.955824
31	24.3712	14.0651	23.4201	14.0215	24.8389	13.3539	2.06878	8.03901	2	5.63636	0.768888
32	24.3663	14.3716	23.3386	15.1199	25.4094	14.5292	2.74346	7.44853	2.72033	7.30058	0.9925
33	24.5725	14.0251	23.7259	15.5741	22.1454	12.168	2.55281	8.68781	2.50104	8.67609	1
34	24.4237	15.2315	24.1821	16.2544	24.1013	13.3605	2.93847	7.45455	3	5.72727	0.763889
35	23.9475	14.3667	24.0225	15.3426	23.979	13.5881	2.66791	7.09091	2.63636	7.72727	1
36	24.4688	14.1922	24.23	16.1336	24.196	12.8639	3.08523	6.81818	3.09091	6.72727	1
37	23.964	13.8669	23.5673	14.2772	23.2232	12.042	3.30428	6.90909	2.36364	6.63636	0.982792
38	23.45	12.0772	24.0758	14.4088	23.2986	12.4985	2.99897	7.63636	3	5.72727	0.779293
39	24.1938	13.1439	23.9586	14.9871	23.8997	12.3655	4.24378	14.7273	4.27273	10.9091	0.81795
40	24.3837	12.8658	23.8715	14.6824	24.8359	13.9588	3.0125	8.18746	2.99619	5.6226	0.695823
41	24.0775	13.0309	22.9975	13.2406	22.9678	12.6921	3.53655	10.8633	3.62503	8.15438	0.768007
42	24.375	14.342	24.3092	15.3353	24.0646	12.746	4.18544	12.3584	4.18182	11.3636	0.777261
43	24.3212	13.9384	24.0725	15.698	24.2135	10.8396	3.90437	12.4191	3.88777	11.6313	1
44	24.0925	13.1913	24.215	14.8774	24.4901	13.2549	2.28815	8.54545	2.36364	7.54545	0.90772
45	23.8188	12.7751	24.2365	15.4547	23.9358	13.6237	3.6641	11.3636	3.67878	8.63636	0.780074
46	24.1038	14.1419	23.5987	14.2185	22.5991	11.4532	2.71139	7.90909	2.69094	5.28564	0.736855
47	24.2268	13.8061	23.8875	15.3145	22.4108	12.0553	3.13637	9.63636	3.27245	7.52194	0.763741
48	24.0738	13.6565	23.1288	14.4223	25.2207	14.7683	2.05386	7.23959	2.07878	4.64613	0.646439
49	23.7759	13.0938	23.3778	13.2277	24.0974	12.3846	3.90947	8.05411	3.99774	7.57471	0.940696
50	24.0388	13.0427	23.7824	14.7868	22.8219	12.0654	2.64248	8.63636	2.72727	5.81818	0.698232
51	23.295	13.7116	23.3734	13.9826	24.1135	12.8501	2.75138	6.87934	2.67245	5.82194	0.84005
52	24.0675	14.5434	23.365	14.808	23.2819	13.2294	2.26015	6.81818	2.20563	7.90909	1
53	24.0888	13.6636	23.9395	14.96	25.1802	13.73	4.1178	10.0909	4.09091	8	0.784734
54	24.1288	14.7866	23.87	15.6531	23.9716	12.9912	3.00628	7.18182	2.99094	8.54545	1
55	24.4275	14.7165	24.1844	14.8868	23.0907	14.3715	2.70969	7.63636	2.67567	7.63636	1
56	24.215	14.8057	23.0378	14.977	24.6584	13.3931	3.12575	6.90909	3.08165	7.36364	1
57	23.4838	13.8521	23.4409	15.4138	22.7249	12.323	3.18079	6.63636	3.18182	6.27273	0.964827
58	22.7125	12.3218	22.4744	13.5957	22.5908	12.754	1.88485	6.20838	1.92033	5.60058	0.887698
59	.	.	.	.	.	.	.	.	.	.	.
60	24.335	14.8948	24.7458	16.3742	24.2683	14.1927	5.58901	13.1989	5.58777	15.9091	0.962049
61	23.335	12.7649	24.1213	15.168	22.5639	12.0835	2.99746	6.84853	2.97938	3.06096	0.396438
62	24.0125	13.952	23.8848	14.1452	24.1509	12.6434	3.28958	14.6633	3.29698	9.61355	0.726347
63	23.0782	12.7897	22.6535	13.6812	23.5388	11.663	1.8202	6.72905	2.14992	4.87787	0.815673
64	23.9719	13.0928	23.3788	13.5784	23.6495	12.1636	3.01554	6.36364	2.97245	5.09091	0.779762
65	23.09	13.072	23.1787	13.4797	25.4342	14.8884	2.67505	6.81818	2.72727	6.27273	0.949459
66	24.2488	14.1989	23.6928	15.2733	25.0132	14.2283	3.17148	8.09091	3.18182	6	0.740981
67	23.78	14.3658	23.6073	14.5132	23.6522	12.8232	2.67691	8.6524	2.72033	6.30058	0.714431
68	23.76	13.3211	23.4225	13.5995	23.5733	12.5223	2.22268	7.05411	2.18182	5.18182	0.745815
69	23.1737	14.0195	22.6378	13.2918	24.6731	13.7524	1.83577	6.18182	1.81818	7.36364	1
70	23.7825	14.7359	23.1553	13.7403	24.3474	13.873	2.5267	6.27273	2.47329	6.57471	1
71	23.0363	13.1855	22.4664	13.5033	23.8116	12.6594	1.86596	8.41301	1.76031	4.9997	0.613876
72	23.235	13.1904	24.1675	15.4546	23.3519	12.4519	4.01293	12.7273	4	8.63636	0.699161
73	24.3825	13.9829	24.052	15.4433	24.4963	13.476	4.83054	15.1363	4.79698	11.9091	0.812045
74	23.225	14.4976	22.6377	13.1131	25.5095	15.3756	2.2434	7.72727	2.27255	6.03919	0.799611
75	23.3837	13.3944	22.9875	13.3971	24.1123	12.6815	4.05923	12.6364	4.07245	9.27273	0.735298
76	23.7512	13.8964	23.0725	14.5665	24.9512	14.7722	1.5165	7.27273	1.54545	6.72727	0.925866
77	23.57	14.6899	23.3025	14.1937	23.8969	12.9914	3.39519	7.87672	3.36364	6.90909	0.904835
78	23.7475	14.9347	23.3801	14.5453	23.7186	12.7834	5.05411	16.0909	5.07245	15.8182	0.991866
79	24.5837	14.489	24.17	15.406	24.0668	13.4797	3.0641	9.3146	3.07878	7.45455	0.7889
80	24.0413	15.1304	23.5133	14.9795	23.6062	13.3184	2.75996	8.82064	2.5772	7.86503	0.896286
81	23.8409	14.3103	22.452	13.6328	24.2671	13.9372	3.64405	8.27273	3.62503	6.36364	0.778535
82	24.1525	14.1561	23.9925	15.0563	25.1299	14.302	2.64992	8.45411	2.60563	6.17471	0.719743
83	24.1025	14.0534	23.5324	15.55	22.9675	12.2796	2.44707	7.85411	2.47329	4.97471	0.639981
84	24.3725	15.5509	23.644	15.0157	23.7148	12.3415	2.27884	8.09091	2.36364	5.27273	0.65873
85	.	.	.	.	.	.	.	.	.	.	.

## Sheet: Ws2 x Ler SNPs
	1	2	3	4	5	6	7	8	9	10	11	12	13	14	15	16	17	18	19	20	21	22	23	24	25	26	27	28	29	30	31	32	33	34	35	36	37	38	39	40	41	42	43	44	45	46	47	48	49
1_453280	0	0	0	0	0	0	0	0	0	0	0	0	0	0	0	0	0	0	0	0	0	0	0	0	0	0	0	0	0	0	0	2	2	0	2	0	1	2	0	0	0	0	0	0	0	0	0	0	0
1_625271	0	0	0	0	0	0	0	0	0	0	0	0	0	0	0	0	0	0	0	0	0	0	0	0	0	0	0	0	0	0	0	0	2	0	2	0	1	2	0	0	0	0	0	0	0	0	0	0	0
1_1634909	0	0	0	0	0	0	0	0	0	0	0	0	0	0	0	0	0	0	0	0	0	0	0	0	0	0	0	0	0	0	0	0	2	0	2	0	1	2	0	0	0	0	0	0	0	0	0	0	0
1_4291565	0	0	0	0	0	0	0	0	0	0	0	0	0	0	0	0	0	0	0	0	0	0	0	0	0	0	0	0	0	0	0	0	2	0	2	0	1	2	0	0	0	0	0	0	0	0	0	0	0
1_5689169	0	0	0	0	0	0	0	0	0	0	0	0	0	0	0	0	0	0	0	0	0	0	0	0	0	0	0	0	0	0	0	0	2	0	2	2	2	2	0	0	0	0	0	0	0	0	0	0	0
1_7527533	0	0	0	0	0	0	0	0	0	0	0	0	0	0	0	0	0	0	0	0	0	0	0	0	0	0	0	0	0	0	0	0	2	0	2	2	2	0	0	0	0	0	0	0	0	0	0	0	0
1_10024510	0	0	0	0	0	0	0	0	0	0	0	0	0	0	0	0	0	0	0	0	0	0	0	0	0	0	0	0	0	0	0	0	2	0	2	2	0	0	0	0	0	0	0	0	0	0	0	0	0
1_10500005	0	0	0	0	0	0	0	0	0	0	0	0	0	0	0	0	0	0	0	0	0	0	0	0	0	0	0	0	0	0	0	0	2	0	2	2	0	0	0	0	0	0	0	0	0	0	0	0	0
1_11461176	0	0	0	0	0	0	0	0	0	0	0	0	0	0	0	0	0	0	0	0	0	0	0	0	0	0	0	0	0	0	0	0	2	0	2	2	0	0	0	0	0	0	0	0	0	0	0	0	0
1_12296953	0	0	0	0	0	0	0	0	0	0	0	0	0	0	0	0	0	0	0	0	0	0	0	0	0	0	0	0	0	0	0	0	2	0	2	2	0	0	0	0	0	0	0	0	0	0	0	0	0
1_12331549	0	0	0	0	0	0	0	0	0	0	0	0	0	0	0	0	0	0	0	0	0	0	0	0	0	0	0	0	0	0	0	0	2	0	0	2	0	0	0	0	0	0	0	0	0	0	0	0	0
1_12418451	0	0	0	0	0	0	0	0	0	0	0	0	0	0	0	0	0	0	0	0	0	0	0	0	0	0	0	0	0	0	0	0	2	0	0	2	2	0	0	0	0	0	0	0	0	0	0	0	0
1_12503213	0	0	0	0	0	0	0	0	0	0	0	0	0	0	0	0	0	0	0	0	0	0	0	0	0	0	0	0	0	0	0	0	2	0	0	2	2	0	0	0	0	0	0	0	0	0	0	0	0
1_13297791	0	0	0	0	0	0	0	0	0	0	0	0	0	0	0	0	0	0	0	0	0	0	0	0	0	0	0	0	0	0	0	0	2	2	0	2	1	0	0	0	0	0	0	0	0	0	0	0	0
1_13494666	0	0	0	0	0	0	0	0	0	0	0	0	0	0	0	0	0	0	0	0	0	0	0	0	0	0	0	0	0	0	0	0	2	2	0	2	1	0	0	0	0	0	0	0	0	0	0	0	0
1_17797266	0	0	0	0	0	0	0	0	0	0	0	0	0	0	0	0	0	0	0	0	0	0	0	0	0	0	0	0	0	0	0	0	2	0	2	2	2	0	0	0	0	0	0	0	0	0	0	0	0
1_19568658	0	0	0	0	0	0	0	0	0	0	0	0	0	0	0	0	0	0	0	0	0	0	0	0	0	0	0	0	0	0	0	0	2	0	2	2	2	0	0	0	0	0	0	0	0	0	0	0	0
1_21391652	0	0	0	0	0	0	0	0	0	0	0	0	0	0	0	0	0	0	0	0	0	0	0	0	0	0	0	0	0	0	0	0	2	0	2	2	2	0	0	0	0	0	0	0	0	0	0	0	0
1_21890478	0	0	0	0	0	0	0	0	0	0	0	0	0	0	0	0	0	0	0	0	0	0	0	0	0	0	0	0	0	0	0	0	2	0	2	2	2	0	0	0	0	0	0	0	0	0	0	0	0
1_22318805	0	0	0	0	0	0	0	0	0	0	0	0	0	0	0	0	0	0	0	0	0	0	0	0	0	0	0	0	0	0	0	0	2	2	2	2	2	0	0	0	0	0	0	0	0	0	0	0	0
1_22890459	0	0	0	0	0	0	0	0	0	0	0	0	0	0	0	0	0	0	0	0	0	0	0	0	2	2	0	2	2	2	2	0	2	2	2	2	2	0	0	1	2	0	2	2	0	2	2	0	2
1_23395084	0	0	0	0	0	0	0	0	0	2	0	0	2	2	0	2	0	0	0	0	0	0	0	0	2	2	0	2	2	2	2	0	2	2	2	2	2	0	0	1	2	0	2	2	0	2	2	0	2
1_23699799	0	0	0	0	0	0	0	0	0	2	0	0	2	2	0	2	0	0	0	0	0	0	0	0	2	2	0	2	2	2	2	0	2	2	2	2	2	0	0	1	2	0	2	2	0	2	2	0	2
1_24386281	0	0	0	0	0	0	0	0	0	2	0	0	2	2	0	2	0	0	0	0	0	0	0	0	2	2	0	2	2	2	2	0	2	2	2	2	2	0	0	2	2	0	2	2	0	2	2	0	2
1_25388659	0	0	0	0	0	0	0	0	0	2	0	0	2	2	0	2	0	0	0	0	0	0	0	0	2	2	0	2	2	2	2	0	2	2	2	0	2	0	0	2	2	0	0	2	0	2	2	0	2
1_26641652	0	0	0	0	0	0	0	0	0	2	0	0	2	2	0	2	0	0	0	0	0	0	0	0	2	2	0	2	2	2	2	0	0	0	0	0	2	0	0	2	2	0	0	2	0	2	2	0	2
1_27163975	0	0	0	0	2	0	0	0	0	2	0	0	2	2	0	2	0	0	0	0	0	0	0	0	2	2	0	2	2	2	2	0	0	0	0	0	2	2	0	2	2	2	0	2	0	2	2	2	2
1_28297681	0	0	2	0	2	0	0	0	0	2	0	0	2	2	0	2	0	0	0	0	0	0	0	0	2	2	0	1	2	2	2	0	0	0	0	0	2	2	0	0	2	2	0	2	0	2	2	2	2
1_28734045	0	0	2	0	2	0	0	0	0	2	0	0	2	2	0	0	0	0	0	0	0	0	0	0	2	2	0	0	2	2	2	0	0	0	0	0	2	2	0	0	2	2	0	2	0	2	2	2	2
1_29365602	0	0	2	0	2	0	0	0	0	0	0	0	2	2	0	0	0	0	0	0	0	0	0	0	2	2	0	0	2	2	2	0	0	0	0	0	2	2	0	0	2	0	0	2	0	2	2	0	2
1_29713424	0	2	2	0	2	0	0	0	0	0	0	0	2	2	0	0	0	0	0	0	0	0	0	0	2	2	0	0	2	2	2	0	0	0	0	0	2	2	0	0	2	0	0	2	0	2	2	0	2
1_30134111	0	2	2	0	2	0	0	0	0	0	0	0	2	2	0	0	0	0	0	0	0	0	0	2	2	2	0	0	2	2	2	0	2	0	0	0	2	2	0	0	2	0	0	2	0	2	2	0	2
2_105236	0	0	0	0	0	0	0	0	0	2	2	2	1	2	2	0	0	0	0	0	0	0	0	0	0	0	0	0	0	0	0	0	0	0	0	0	0	0	0	0	0	0	0	0	0	0	0	0	0
2_2213462	2	2	2	0	0	2	1	0	0	0	0	0	0	0	0	0	0	0	0	0	0	0	0	0	0	0	0	0	0	0	0	0	0	0	0	0	0	0	0	0	0	0	0	0	0	0	0	0	0
2_5795984	2	2	2	0	0	2	1	0	0	0	0	0	0	0	0	0	0	0	0	0	0	0	0	0	0	0	0	0	0	0	0	0	0	0	0	0	0	0	0	0	0	0	0	0	0	0	0	0	0
2_6620062	2	2	2	0	2	2	1	0	0	0	0	0	0	0	0	0	0	0	0	0	0	0	0	0	0	0	0	0	0	0	0	0	0	0	0	0	0	0	0	0	0	0	0	0	0	0	0	2	0
2_7232297	2	2	2	0	2	2	0	0	0	0	0	0	0	0	0	0	0	0	0	0	0	0	0	1	2	0	0	0	2	2	0	0	0	0	0	0	0	0	0	0	0	0	0	0	0	0	0	2	0
2_8089046	2	2	2	0	2	2	2	0	0	0	0	0	0	0	0	0	0	0	0	0	0	0	0	1	0	0	0	0	2	2	0	0	0	0	0	0	0	0	0	0	0	0	0	0	0	0	0	2	0
2_8852237	2	2	2	0	2	2	2	0	0	0	0	0	0	0	0	0	0	0	0	0	0	0	0	2	0	0	0	0	2	2	0	0	0	0	0	0	0	0	0	0	0	0	0	0	0	0	0	2	0
2_9095046	2	2	2	0	2	2	2	0	0	0	0	0	0	0	0	0	0	0	0	0	0	0	0	2	0	0	0	0	2	2	0	0	0	0	0	0	0	0	0	0	0	0	0	0	0	0	0	2	0
2_9661488	2	2	2	0	0	2	2	0	0	0	0	0	0	0	0	0	0	0	0	0	0	0	0	0	0	2	0	0	2	2	0	0	0	0	0	0	0	0	0	0	0	0	0	0	0	0	0	2	0
2_9981557	2	2	1	0	0	2	2	0	0	0	0	0	0	0	0	0	0	0	0	0	0	0	0	0	0	2	0	0	2	2	0	0	0	0	0	0	0	0	0	0	0	0	0	0	0	0	0	0	0
2_10883418	2	2	0	0	0	2	2	0	0	0	0	0	0	0	0	0	0	0	2	0	0	2	2	0	0	2	0	0	2	2	0	0	0	0	0	0	0	0	0	0	0	0	0	0	0	0	0	0	0
2_11074551	2	2	0	0	0	2	2	0	0	0	0	0	0	0	0	0	0	0	2	0	0	2	2	2	0	2	0	0	2	2	0	0	0	0	0	0	0	0	0	0	0	0	0	0	0	0	0	0	0
2_12285634	2	2	0	0	0	2	2	0	0	0	0	0	0	0	0	0	0	0	2	0	0	2	2	2	0	2	0	0	2	2	0	0	0	0	0	0	0	0	0	0	0	0	2	0	0	0	2	0	0
2_12650745	2	0	0	0	0	2	2	0	0	0	0	0	0	0	0	0	0	0	2	0	0	2	1	2	0	2	0	0	2	2	0	0	0	0	0	0	0	0	0	0	0	0	2	0	0	0	2	0	0
2_13072779	2	0	0	0	0	2	2	0	0	0	0	0	0	0	0	0	0	0	2	0	0	2	1	2	0	2	0	0	2	2	0	0	0	0	0	0	0	0	0	0	0	0	2	0	0	0	2	0	0
2_17179798	2	0	0	0	0	2	2	0	0	0	0	0	0	0	0	0	0	0	2	0	0	2	1	0	0	0	0	0	0	0	0	0	0	0	0	0	0	0	0	0	0	0	2	0	0	0	2	0	0
2_17789107	2	0	0	0	0	2	2	0	0	0	0	0	0	0	0	0	0	0	2	0	0	2	0	0	0	0	0	0	0	0	0	0	0	0	0	0	0	0	0	0	0	0	2	0	0	0	2	0	0
2_18991508	2	2	0	0	0	2	2	0	0	0	0	0	0	0	0	0	0	0	2	0	0	2	2	0	0	0	0	0	0	0	0	0	0	0	0	0	0	0	0	0	0	0	2	0	0	0	2	0	0
2_19204900	2	2	0	0	0	2	2	0	0	0	0	0	0	0	0	0	1	2	2	0	0	2	2	0	0	0	0	0	0	0	0	0	0	0	0	0	0	0	0	0	0	0	2	0	0	0	2	0	0
3_251628	0	0	0	0	0	1	0	0	0	2	2	0	0	2	2	2	2	2	2	2	2	2	2	0	0	0	0	0	0	0	0	0	0	0	0	0	0	0	0	0	0	0	0	0	0	0	0	2	2
3_849706	2	2	2	2	2	2	2	2	2	2	0	0	2	0	0	0	0	0	0	0	0	0	0	0	0	0	0	0	0	0	2	2	2	2	2	2	2	2	2	2	0	0	0	0	0	0	2	0	0
3_1442067	2	2	2	2	2	2	2	2	2	2	0	0	2	0	0	0	0	0	0	0	0	0	1	0	0	0	0	0	0	0	2	2	2	2	2	2	2	2	2	2	0	0	0	0	0	0	2	0	0
3_1883603	0	1	0	0	0	0	0	2	0	2	0	0	2	0	0	0	0	0	0	0	0	0	1	0	0	0	0	0	0	0	2	2	2	2	2	2	2	2	2	2	0	0	0	0	0	0	2	0	0
3_2008043	0	1	0	0	0	0	0	2	0	2	0	0	2	0	0	0	0	0	0	0	0	0	1	0	0	0	0	0	0	0	2	2	2	0	0	0	2	1	0	2	0	0	0	0	0	0	2	0	0
3_3271939	0	1	0	0	0	0	0	0	0	2	0	0	1	0	0	0	0	0	0	0	0	0	1	0	0	0	0	0	0	0	0	2	2	0	0	0	2	1	0	2	0	0	0	0	0	0	2	0	0
3_4160087	0	1	0	0	0	0	0	0	0	2	0	0	0	0	0	0	0	0	0	0	0	0	1	0	0	0	0	0	0	0	0	2	2	0	0	0	1	1	0	2	0	0	0	0	0	0	0	0	0
3_5551187	0	1	0	0	0	0	0	0	0	0	0	0	0	0	0	0	0	0	0	0	0	0	1	0	0	0	0	0	0	0	0	2	2	0	0	0	2	1	0	2	0	0	0	0	0	0	0	0	0
3_7383848	0	0	0	0	0	0	0	0	0	0	0	0	0	0	0	0	0	0	0	0	0	0	1	0	0	0	0	0	0	0	0	2	0	0	0	0	2	1	0	0	0	0	0	0	0	0	0	0	0
3_8185972	0	0	0	0	0	0	0	0	0	0	0	0	0	0	0	0	0	0	0	0	0	0	1	0	0	0	0	0	0	0	0	2	0	0	0	0	0	0	0	0	0	0	0	0	0	0	0	0	0
3_8816904	0	0	0	0	0	0	0	0	0	0	0	0	0	0	0	0	0	2	0	0	0	0	1	0	0	0	0	0	0	0	0	2	0	0	0	0	0	0	0	0	2	0	0	0	0	0	0	0	0
3_9064585	0	0	2	0	0	0	0	0	0	0	0	0	0	0	0	0	0	2	0	0	0	0	2	0	0	0	0	0	0	0	0	2	0	0	0	0	0	0	0	0	2	0	0	2	0	0	2	2	2
3_11273605	0	0	0	2	2	0	0	0	2	2	2	2	2	2	2	2	0	2	0	0	0	0	2	2	0	0	0	0	0	0	0	2	2	0	0	2	0	2	1	0	2	0	0	2	1	0	2	2	2
3_11978739	2	2	2	0	0	2	2	2	0	0	0	0	0	0	0	0	0	0	0	0	0	0	0	0	2	2	2	2	2	2	2	0	0	2	2	0	2	0	2	2	0	2	2	0	1	0	0	0	0
3_14704801	2	2	2	0	0	2	2	2	0	0	0	0	0	0	0	0	0	0	0	0	0	0	0	0	2	2	2	2	2	2	2	0	0	0	2	0	2	0	1	2	0	0	2	0	1	0	0	0	0
3_16092857	2	2	2	0	1	2	2	0	0	0	0	0	0	0	0	0	0	0	0	0	0	0	0	0	2	2	2	2	2	2	2	0	0	0	2	0	2	0	1	2	0	0	2	0	1	0	0	0	0
3_16730869	2	2	2	0	1	2	2	0	0	0	0	0	0	0	0	0	0	0	0	0	0	0	0	0	2	2	2	0	2	2	2	0	0	0	2	0	2	0	1	2	0	0	2	0	0	0	0	0	0
3_17291115	2	2	2	0	0	2	0	0	0	0	0	0	0	0	0	0	0	0	0	0	0	0	0	0	0	0	0	0	0	0	0	2	0	0	2	0	2	0	1	2	0	0	2	0	0	0	0	0	0
3_18457285	0	2	2	0	0	2	0	0	0	0	0	0	0	0	0	0	0	0	0	0	0	0	0	0	0	0	0	0	0	0	0	2	0	0	2	0	2	0	0	2	0	0	2	0	2	0	2	0	0
3_21228655	0	0	0	0	0	0	0	0	0	0	0	0	0	0	0	0	2	0	2	0	0	2	2	0	0	0	0	0	0	0	0	0	0	0	0	0	0	0	0	0	0	0	0	0	0	0	0	0	0
3_23237405	0	0	0	0	0	0	0	0	0	0	0	0	0	0	0	0	2	0	2	0	0	2	2	0	0	0	0	0	0	0	0	0	0	0	0	0	0	0	0	0	0	0	0	0	0	0	0	0	0
4_855491	0	0	2	0	2	1	0	2	0	2	0	0	1	2	0	0	2	2	2	0	0	0	2	0	0	0	0	0	0	0	0	0	0	2	0	0	0	2	2	2	0	0	0	2	2	2	0	0	0
4_912774	0	0	2	2	2	1	0	2	0	2	0	0	1	2	0	0	2	2	2	0	0	0	2	0	0	0	0	0	0	0	0	0	0	2	0	0	0	2	2	2	0	0	0	2	2	2	0	0	0
4_1180562	0	0	2	2	2	1	0	2	0	2	0	0	1	2	0	0	2	2	2	0	0	0	2	0	0	0	0	0	0	0	0	0	0	2	0	0	0	2	2	2	0	0	0	2	2	2	0	2	0
4_3620330	0	0	2	2	2	1	0	2	0	2	0	0	0	2	0	0	2	2	2	0	0	0	2	0	0	0	0	0	0	0	0	0	0	2	0	2	0	2	2	2	2	0	0	2	2	2	0	2	0
4_5377795	2	2	0	0	0	1	2	0	2	0	2	2	2	0	2	2	0	0	0	2	2	2	0	2	2	2	2	2	2	2	2	0	2	0	0	0	2	0	0	0	0	2	2	0	0	0	0	0	2
4_5811561	2	2	0	0	0	1	0	0	2	0	2	2	2	0	2	2	0	0	0	2	2	2	0	2	2	2	2	2	2	2	2	0	2	0	0	0	2	0	0	0	0	2	2	0	1	0	0	0	2
4_5854777	2	2	0	0	0	1	0	0	2	0	2	2	2	0	2	2	0	0	0	2	2	2	0	2	2	2	2	2	2	2	2	0	2	0	0	0	2	0	0	0	0	2	2	0	1	0	0	0	2
4_6272690	2	0	0	0	0	0	0	1	2	0	2	2	2	0	2	2	0	0	0	2	2	2	0	2	2	2	2	2	2	2	2	0	2	0	0	0	2	0	0	0	0	2	2	0	1	0	0	0	2
4_6575211	2	0	0	0	0	0	0	1	2	0	2	2	2	0	2	0	0	2	0	2	2	2	0	2	2	2	2	2	2	2	2	0	2	0	0	0	2	0	0	0	0	2	2	0	1	0	0	0	0
4_7036044	2	0	2	0	0	0	0	1	2	0	2	2	2	0	2	0	0	2	0	2	2	2	0	2	2	2	2	2	2	2	2	0	2	0	0	0	2	0	0	0	0	2	2	0	0	0	0	0	0
4_7116195	2	0	2	0	0	0	0	1	2	0	2	2	2	0	2	0	0	2	0	2	2	1	0	2	2	2	2	2	2	2	2	0	2	0	0	0	2	0	0	0	0	0	2	0	0	0	0	0	0
4_9390932	1	0	2	0	2	0	0	1	2	2	2	2	2	0	2	2	0	2	0	2	2	1	0	2	2	2	2	2	2	2	2	0	2	0	0	0	2	0	0	0	0	0	2	0	0	0	0	2	0
4_10801466	0	0	0	0	0	0	0	0	0	0	2	0	0	2	0	0	2	0	2	0	0	0	2	0	0	0	0	0	0	0	0	2	0	2	2	2	0	2	2	2	2	0	0	2	0	2	2	0	0
4_11001155	0	0	0	0	0	0	0	0	0	0	2	0	0	2	0	0	2	0	2	0	0	0	2	0	0	0	0	0	0	0	0	1	0	0	0	0	0	0	0	2	2	0	0	2	0	2	2	0	0
4_11197273	0	0	0	0	0	0	0	0	0	0	2	0	0	2	0	0	2	0	2	0	0	0	2	0	0	0	0	0	0	0	0	0	0	0	0	0	0	0	0	2	2	0	0	2	0	2	2	0	0
4_11739311	0	0	0	0	0	0	0	0	2	0	2	0	0	2	0	0	2	0	2	0	0	0	2	0	0	0	0	0	0	0	0	0	0	0	0	0	0	0	0	0	2	0	0	2	0	2	2	0	0
4_14503021	0	0	0	0	0	0	0	0	2	2	0	0	0	2	0	0	1	0	1	0	0	0	0	0	0	0	0	0	0	0	0	0	0	0	0	0	0	0	0	0	2	0	0	2	0	0	2	0	0
4_14916294	0	0	0	0	0	0	0	0	2	2	0	0	0	0	0	1	0	0	1	0	0	0	0	0	0	0	0	0	0	0	0	0	0	0	0	0	0	0	0	0	2	0	0	2	0	0	2	0	0
4_15598786	0	0	0	0	0	0	0	0	2	2	0	0	0	0	2	1	0	0	0	0	0	0	0	0	0	0	0	0	0	0	0	0	0	0	0	0	0	0	0	0	2	0	0	2	0	0	2	0	0
4_16304228	0	0	0	0	0	0	0	0	2	2	0	0	0	0	2	1	0	0	0	0	0	0	0	0	0	0	2	2	2	2	2	0	0	0	0	0	0	0	0	0	2	0	0	2	0	0	2	0	0
4_18295699	0	0	0	0	0	0	0	0	2	2	0	0	0	0	2	1	0	0	0	0	0	0	0	0	0	0	2	2	2	2	2	0	0	0	0	0	0	0	0	0	0	0	0	0	0	0	0	2	0
5_861774	0	0	0	0	0	0	0	0	0	0	0	0	0	0	0	0	0	0	0	0	0	0	0	0	0	0	0	0	0	0	0	2	0	2	2	0	0	0	2	0	0	0	0	0	0	0	0	0	0
5_1335242	0	0	0	0	0	0	0	0	0	0	0	0	0	0	0	0	0	0	0	0	0	0	0	0	0	0	0	0	0	0	0	2	0	2	2	0	0	0	2	0	0	0	0	0	0	0	0	0	0
5_2026769	0	0	0	0	0	0	0	0	0	0	0	0	0	0	0	0	0	0	0	0	0	0	0	0	0	0	0	0	0	0	0	2	0	2	2	0	0	0	2	0	0	0	0	0	0	0	0	0	0
5_4702566	0	0	0	0	0	0	0	0	0	0	0	0	0	0	0	0	0	0	0	0	0	0	0	0	0	0	0	0	0	0	0	0	0	0	0	0	0	0	0	2	0	2	2	2	2	0	2	0	0
5_6621695	0	0	0	0	0	0	0	0	0	0	0	0	0	0	0	0	2	2	0	2	2	2	2	0	0	0	0	0	0	0	0	0	0	0	0	0	0	0	0	0	0	0	0	0	0	0	0	0	0
5_7486770	0	0	0	0	0	0	0	0	0	0	0	0	0	0	0	0	2	2	0	2	2	2	2	0	0	0	0	0	0	0	0	0	0	0	0	0	0	0	0	0	0	0	0	0	0	0	0	0	0
5_7894594	2	0	2	0	2	0	2	2	0	0	0	0	0	0	0	0	2	2	0	2	2	2	2	0	0	0	0	0	0	0	0	0	0	0	0	0	0	0	0	0	0	0	0	0	0	0	0	0	0
5_9315421	2	0	2	2	2	2	0	2	0	0	0	0	0	0	0	0	0	2	0	2	2	2	0	0	0	0	0	0	0	0	0	0	0	0	0	0	0	0	0	0	0	0	0	0	0	0	0	0	0
5_13864664	2	0	2	2	2	2	0	2	0	2	2	0	0	0	0	2	0	0	0	2	2	2	0	0	0	0	0	0	0	0	0	0	0	0	0	0	0	0	0	0	0	0	0	0	0	0	0	0	0
5_15817199	2	0	2	2	0	2	0	2	2	2	2	0	0	0	0	2	0	0	0	2	2	2	0	0	0	0	0	0	0	0	0	0	0	0	0	0	0	0	0	0	0	0	0	0	0	0	0	2	0
5_19381853	0	2	2	2	0	0	2	2	2	0	2	0	0	0	2	0	0	0	0	2	2	2	0	0	0	0	0	0	0	0	0	0	0	0	0	0	0	0	0	0	0	0	0	0	0	0	0	2	0
5_19684642	0	2	2	2	0	0	2	2	2	0	2	0	0	0	2	0	0	0	0	2	2	2	0	0	0	0	0	0	0	0	0	2	2	0	0	0	2	0	2	0	0	0	0	0	0	0	0	2	0
5_21141781	0	2	2	2	0	0	2	2	2	0	2	0	0	0	2	0	0	0	0	2	2	2	0	0	0	0	0	0	0	0	0	2	2	0	0	0	2	0	2	0	0	0	0	0	0	0	0	2	0
5_24058059	0	2	2	2	0	0	2	2	2	0	0	0	0	0	2	0	2	0	0	2	2	2	0	0	0	0	0	0	0	0	0	2	2	2	0	0	2	0	0	0	0	0	0	0	0	0	0	2	0
5_24941285	0	2	2	2	0	0	2	2	2	0	0	0	0	0	2	0	2	0	0	2	2	2	0	0	0	0	0	0	0	0	0	2	2	2	0	0	2	0	0	0	0	0	0	0	0	0	0	2	0
5_25513597	0	2	2	2	0	0	2	2	2	0	0	0	0	0	2	0	2	0	0	2	2	2	0	0	0	0	0	0	0	0	0	2	2	2	0	2	2	0	0	0	0	0	0	0	0	0	0	2	0
5_25754948	2	0	0	0	2	2	0	0	0	2	0	2	2	2	0	2	0	2	2	0	0	0	2	2	2	2	2	2	2	2	2	0	0	0	2	0	0	2	2	2	2	2	2	2	2	2	2	0	2
5_26260443	2	0	0	0	2	2	0	0	0	2	0	2	2	2	0	2	0	2	0	0	0	0	2	2	2	0	2	0	0	0	2	2	2	0	2	0	2	0	2	2	2	2	2	2	2	2	2	0	2
[truncated: 41 more columns]

## Sheet: Ws2 x Ler Traits
RIL	Period_June	Phase_June	Period_July	Phase_July	Period_Sept	Phase_Sept	Cauline_Leaf_Number	Rosette_Leaf_Number	Cauline_Branch_Number	Rosette_Branch_Number	Rosette_Meristem_Fate
1	.	.	.	.	.	.	.	.	3.01493	7.19971	.
2	25.5621	8.9113	24.3154	10.8111	25.4407	8.67868	1.95279	7.64374	2.38763	5.35843	0.702741
3	24.437	8.73555	23.8409	11.7481	24.7828	9.09938	2.54589	7.28571	2.58018	5.25801	0.726162
4	26.3508	8.99513	24.644	12.6113	24.3928	9.37562	2.90538	7.64286	3.06441	5.40906	0.697357
5	24.3957	9.27876	22.8947	10.8343	23.1763	9.89023	2.86274	9.95394	2.73755	5.84763	0.609661
6	.	.	.	.	.	.	.	.	2.3845	5.21556	.
7	25.0214	8.83321	23.2362	9.70532	23.4088	8.00362	2.25198	7.37265	2.24734	5.03618	0.762869
8	25.3505	8.86436	23.748	12.6804	24.2135	9.40923	2.1782	6.68939	2.20949	4.41448	0.679103
9	24.6307	9.51053	23.0912	10.1903	24.6549	8.88291	2.24451	6.40922	2.39637	4.50952	0.70355
10	25.3833	9.61807	22.4569	10.7039	23.2989	9.47737	2.52968	7.42857	2.58404	4.27649	0.64237
11	22.8019	8.27724	23.1792	12.2339	23.5	8.97242	2.20148	8.32689	3.07056	4.43676	0.594494
12	25.4224	8.85134	22.7137	9.79732	25.015	8.81338	2.31431	8.57143	2.29587	5.07211	0.601389
13	23.4719	8.72326	21.9756	10.5425	23.1343	9.25145	2.6086	8.76636	2.47384	5.09407	0.599901
14	23.7841	9.79885	21.7306	10.4063	23.7978	10.6428	2.39967	6.85714	2.45857	4.39681	0.634297
15	23.3662	8.60643	23.2575	10.7029	23.442	9.3732	2.65633	8.05504	2.37347	4.71012	0.642557
16	24.026	9.29757	22.5171	11.0191	22.9435	9.21937	2.44513	7	2.42857	4.71429	0.684524
17	24.7657	8.85384	22.1922	9.83809	24.2329	9.99021	2.62033	8.32091	2.714	4.38907	0.594601
18	22.2357	8.90086	22.4903	9.96109	23.9975	10.0846	2.66093	8.92857	2.77145	5.62645	0.638566
19	23.8209	8.5296	22.65	11.0162	23.342	9.03348	2.05034	7.57143	1.989	4.32785	0.618991
20	.	.	.	.	.	.	.	.	2.81847	4.53354	.
21	23.0388	9.65088	23.6366	11.6424	22.896	8.04859	3.11175	7.52258	3.16242	4.24897	0.540299
22	24.5554	9.26922	22.84	8.88863	24.0265	9.43331	1.80225	7.8389	2.29953	4.63509	0.59506
23	24.884	9.84579	23.0374	11.0293	23.8811	10.2279	1.62991	9.64286	1.68949	5.23677	0.600787
24	25.0217	8.56924	23.0715	10.8021	24.5556	9.55923	2.04216	9.42513	1.98664	5.59026	0.63354
25	25.071	8.79737	23.51	10.8426	22.9685	8.51294	1.80699	8.99809	2.12999	5.08465	0.619581
26	26.1624	9.03134	22.2888	11.3437	22.7762	9.53923	2.78044	7.92857	3.00701	4.72331	0.593254
27	24.0438	8.94736	23.5032	10.6945	24.4534	9.42006	2.58922	10.0901	2.89276	5.1108	0.53284
28	23.6483	9.07154	23.3458	11.8449	23.1099	7.45625	2.52119	6.6456	2.52681	4.35174	0.653827
29	23.6913	9.49425	22.672	10.964	23.4475	9.09775	2.53175	7.85714	2.69538	4.65104	0.709609
30	24.0697	9.66479	23.3559	12.3044	23.4343	9.40185	2.84435	7.98841	2.84139	5.47706	0.737764
31	23.3069	8.64782	23.1788	12.2069	23.6462	10.0051	2.53273	7.14286	2.59397	5.28704	0.696712
32	25.6301	11.1038	22.6046	11.5947	23.116	9.70261	3.11358	9.1035	3.12888	4.61099	0.564223
33	24.698	9.16302	23.3884	9.98871	23.5623	9.84558	2.54128	5.96823	2.29669	3.76047	0.619446
34	23.9285	8.71709	23.5848	10.537	24.5959	10.9241	2.10391	6.63872	2.31072	4.86304	0.746321
35	25.11	9.05425	24.8575	12.6589	24.2688	9.46075	3.141	7.98341	3.34483	5.31245	0.650881
36	23.7284	8.73324	23.7453	12.0632	24.0657	8.42471	2.77596	7.71565	3.16665	5.01219	0.667195
37	24.5871	9.85937	24.6494	13.2478	23.5214	8.25746	2.1972	8.92857	2.38041	5.4234	0.691076
38	22.7734	9.54016	23.4743	11.9065	23.9181	10.6242	3.15997	9.32997	2.74796	5.20914	0.580358
39	23.7306	8.55997	24.9835	12.689	25.5724	10.689	2.03972	7.73428	1.84089	4.25061	0.600417
40	23.0551	8.97659	23.457	11.2116	23.331	9.49692	2.24107	7.39003	2.29544	4.19959	0.602355
41	24.1393	9.1439	23.3591	12.3911	23.1172	9.44172	2.66488	8.06034	2.81235	6.32083	0.794105
42	24.3609	8.6615	23.2641	11.4916	23.3806	8.3812	2.30223	9.44995	2.54008	5.19618	0.595401
43	23.5604	8.82774	23.7829	11.189	23.005	8.26511	2.40221	8.8751	2.48174	5.16223	0.626143
44	23.9968	9.86081	22.2898	10.3605	23.0125	9.437	3.01225	8.45305	3.17213	5.12655	0.611477
45	24.518	8.68397	22.4964	10.0217	24.54	9.53138	2.40621	8.26924	2.28034	5.34403	0.647921
46	22.8788	9.25388	22.4306	11.469	23.9373	9.79624	2.35979	9.21484	2.28111	5.47704	0.644907
47	24.1788	9.17873	23.2304	10.9328	23.0567	9.41607	1.92242	11.7938	1.93708	6.53894	0.582036
48	23.4511	10.2381	23.3053	11.7349	22.1238	8.90207	2.35937	7	2.37479	4.89093	0.695692
49	23.4284	9.09779	21.8584	10.4469	22.6913	9.62314	2.84475	7.6639	2.82385	4.96599	0.652608
50	24.8585	9.73989	22.572	11.5456	22.9763	9.41038	2.31554	7.23618	2.51712	4.71378	0.696053
51	22.9594	9.3251	23.7298	12.5893	23.263	9.26739	3.11582	8.84215	3.49021	5.48993	0.65615
52	22.9483	9.38575	22.6749	10.6591	22.5285	8.41955	2.67086	7.76351	2.97672	4.23512	0.578831
53	22.9787	9.16293	22.1729	8.71637	23.0566	11.197	2.00939	7.81164	2.15331	5.39934	0.654295
54	23.0355	9.43336	21.8238	8.91605	21.8575	8.67673	2.32568	8.18564	2.42129	5.52437	0.687651
55	24.5258	9.22163	21.2301	9.55522	22.9366	9.40206	2.31364	7.92849	3.20548	5.09031	0.724303
56	23.5427	9.30093	23.7063	11.1574	23.7037	9.99638	2.28288	8.4307	2.41326	5.82657	0.719973
57	24.1657	9.65887	24.536	11.9442	25.0057	9.10664	2.37923	6.8461	2.34521	4.69636	0.725022
58	25.8703	8.96776	24.0461	10.3157	25.0171	9.50671	2.61088	7.68072	2.63688	5.79994	0.812231
59	24.7297	8.15429	23.7462	9.60565	24.5889	8.93631	2.90384	9.09087	2.94917	4.48283	0.597872
60	24.3087	9.48691	23.8036	12.1114	24.5384	10.3757	2.6834	11.3266	2.75326	6.07032	0.625655
61	24.8047	9.0523	25.3723	13.3131	24.8241	9.98518	2.40246	8.48586	2.53042	4.7042	0.579898
62	24.8379	10.9358	23.2271	9.4221	24.255	9.46481	2.0897	7.68473	2.12582	4.45986	0.607066
63	23.8342	9.70372	23.775	12.507	24.2624	10.0176	2.22989	11.4778	2.19477	6.51139	0.595519
64	23.998	9.0769	23.9914	11.2205	23.1931	8.75166	2.85396	6.11448	2.50234	4.15434	0.660729
65	24.3141	8.79113	24.0278	11.7854	23.84	8.91775	2.64518	8.11686	2.87939	4.41243	0.538234
66	23.5256	9.27222	22.0335	9.97587	23.0459	9.19053	2.66637	7.85598	2.51625	4.43946	0.582523
67	23.5271	8.28567	22.1345	9.49358	22.2937	9.24013	2.18434	6.63999	2.17795	4.17188	0.610308
68	23.8559	8.47814	24.3005	10.4546	24.1837	10.2017	2.46085	5.71484	2.43404	3.53822	0.691176
70	24.4211	8.97815	22.8749	10.3464	23.0916	8.17994	2.04652	7.67573	2.06506	4.77663	0.625091
71	23.8744	9.75325	23.3073	11.8118	23.0477	9.99848	3.40255	7.92021	3.4376	4.3431	0.55741
72	25.0875	8.81429	24.5879	11.5555	24.4756	10.3881	2.82488	8	2.83972	5.01956	0.653628
73	24.0266	9.58708	23.3415	10.9283	23.4594	9.53746	2.09251	7.98412	2.14506	5.06869	0.644373
74	.	.	.	.	.	.	.	.	3.02801	5.27302	.
75	23.5058	9.48037	23.8736	10.562	22.7535	7.78303	2.32572	7.14286	2.29674	5.45826	0.766156
76	24.9788	8.82529	23.7275	11.9046	22.9072	8.54621	2.02026	7.23125	2.08464	4.67657	0.671143
77	.	.	.	.	.	.	.	.	2.72861	4.30374	.
78	25.0164	9.29497	23.4781	10.7013	23.3075	9.65875	3.07419	9.02461	3.05865	4.68485	0.552958
79	24.3569	8.76018	24.7495	14.2908	24.3085	10.075	2.30815	9.14286	2.17055	5.16649	0.606751
80	24.2504	8.99174	23.7607	11.3975	24.2025	10.0173	2.59005	7.24398	2.60502	5.44997	0.766426
82	23.6716	9.36522	23.1082	11.8935	23.3675	10.5203	2.31602	6.14286	2.38356	3.33793	0.607909
85	23.8447	9.61496	22.9046	10.7528	23.2849	10.4046	2.12339	6.56458	1.92932	4.66704	0.701386
86	23.2029	9.14676	22.0246	8.02062	23.7775	9.7015	2.25331	6.6825	2.29552	4.1012	0.685333
87	25.2458	10.4546	22.9339	8.49827	23.3849	9.02694	2.05094	8.42857	2.24173	5.88495	0.674771
88	.	.	.	.	.	.	.	.	2.46665	5.05288	.
89	22.706	8.5957	.	.	23.7749	10.6025	.	.	2.35183	3.94014	.
90	.	.	22.3342	10.0001	.	.	2.09968	.	2.75681	4.02255	.
91	.	.	.	.	.	.	.	.	2.36127	4.80349	.
92	.	.	.	.	.	.	.	.	2.39868	3.91994	.
93	.	.	.	.	.	.	.	.	2.49984	3.646	.
94	.	.	.	.	.	.	.	.	2.54837	4.47073	.

## Sheet: Ler x Ws2 SNPs
	95	96	97	98	99	100	101	102	103	104	105	106	107	108	109	110	111	112	113	114	115	116	117	118	119	120	121	122	123	124	125	126	127	128	129	130	131	132	133	134	135	136	137	138	139	140	141	142	143
1_238424	2	2	2	2	2	2	0	2	2	0	2	2	0	0	0	0	0	0	0	2	0	0	2	0	0	2	0	0	2	0	2	2	2	0	0	2	0	2	0	0	0	0	0	0	2	2	2	2	1
1_247065	2	2	2	2	2	2	0	2	2	0	2	2	0	0	0	0	0	0	0	2	0	0	2	0	0	2	0	0	2	0	2	2	2	0	0	2	0	2	0	0	0	0	0	0	2	2	2	2	1
1_1634909	2	2	2	2	2	2	0	2	2	0	0	2	0	0	0	1	0	0	0	2	0	0	0	0	0	2	0	0	2	2	2	0	2	0	0	2	0	2	0	0	0	0	0	0	2	2	2	2	1
1_2987917	2	2	2	2	2	2	0	2	2	0	0	2	0	0	0	0	0	0	0	2	0	0	0	0	0	0	0	0	2	2	2	0	2	0	0	2	0	2	0	0	0	0	1	0	2	2	2	2	1
1_4291565	2	2	2	2	2	2	0	2	2	0	0	2	0	0	0	2	0	2	0	2	0	0	0	0	0	0	0	0	2	2	2	0	2	0	0	2	0	2	0	0	0	0	1	0	2	2	2	2	1
1_6780203	2	2	2	2	2	2	0	2	2	0	0	2	0	0	0	2	0	2	0	2	0	0	2	0	0	0	0	0	2	2	0	0	2	0	0	2	0	2	0	0	0	0	2	0	2	2	2	2	1
1_7105870	2	2	2	2	2	2	0	2	2	0	0	2	0	0	0	2	0	2	0	2	0	0	2	0	0	0	0	0	2	2	0	0	2	0	0	2	0	2	0	0	0	0	2	0	2	2	0	0	1
1_7277186	2	2	2	2	2	2	0	2	2	0	0	2	0	0	0	2	0	2	0	2	0	2	2	0	0	0	0	0	2	2	0	0	2	0	0	2	0	2	0	0	0	0	2	0	2	2	0	0	2
1_9140674	2	2	2	2	2	2	0	2	2	0	0	2	2	1	2	2	1	2	0	2	2	2	2	0	0	0	0	0	0	0	0	0	2	0	2	2	0	0	0	0	1	0	2	0	2	0	0	0	1
1_10500005	2	2	2	2	2	2	0	2	2	0	0	2	2	1	2	2	2	2	0	2	2	2	2	0	0	0	0	0	0	0	0	0	2	0	2	2	0	0	0	0	1	0	2	0	2	0	0	0	1
1_10914543	2	2	2	2	2	2	0	2	2	0	0	2	2	2	2	2	2	2	0	2	2	2	0	0	0	0	0	0	0	0	0	0	2	0	2	2	0	0	0	0	1	0	2	0	2	0	0	0	1
1_11461176	2	2	2	2	2	2	0	2	2	0	0	2	2	2	2	2	2	2	0	0	0	2	0	0	0	0	0	0	0	0	0	0	2	0	2	2	0	0	0	0	1	0	2	0	2	0	0	0	1
1_12503213	2	2	2	2	2	2	0	2	2	0	0	2	2	2	2	2	2	2	0	0	0	2	0	0	0	0	0	0	0	0	0	0	2	0	2	2	0	0	0	0	0	0	2	0	2	0	0	0	1
1_12848552	2	2	2	2	2	2	0	0	2	0	0	2	2	2	2	2	2	2	0	0	0	2	0	0	0	0	0	0	0	0	0	0	2	0	2	2	0	0	0	0	1	0	2	0	2	0	0	0	1
1_13297791	0	2	0	0	0	0	0	0	0	0	0	2	2	2	2	2	2	2	0	0	0	2	0	0	0	0	0	0	0	0	0	0	2	0	1	2	0	0	0	0	0	0	2	0	2	0	0	0	1
1_17797266	0	2	0	0	0	0	0	0	0	0	0	0	0	0	0	0	1	0	0	0	0	0	0	0	0	0	0	0	0	0	0	0	2	0	1	2	0	0	0	0	0	0	2	0	2	0	0	0	1
1_17880303	0	2	0	0	0	0	0	0	0	0	0	0	0	0	0	0	0	0	0	0	0	0	0	0	0	0	0	0	0	0	0	0	2	0	1	2	0	0	0	0	0	0	0	2	2	0	0	0	1
1_18082872	0	0	0	0	0	0	0	0	0	0	0	0	0	0	0	0	0	0	0	0	0	0	0	0	0	0	0	0	0	0	0	0	2	0	1	2	0	0	0	0	0	0	0	2	0	0	0	0	1
1_18639168	2	0	0	2	0	0	0	0	2	0	0	0	0	0	0	0	0	0	0	0	0	0	0	2	0	0	0	0	0	0	0	0	0	0	0	2	0	0	0	0	0	0	0	2	0	0	0	0	1
1_18996292	2	0	0	2	0	0	0	0	2	0	0	0	0	0	0	0	0	0	0	0	0	0	0	2	0	0	0	0	0	0	0	0	0	0	0	2	0	0	0	0	0	0	2	2	0	0	0	0	1
1_19112343	2	2	0	2	0	0	0	0	2	0	0	0	0	0	0	0	0	0	0	0	0	0	0	2	0	0	0	0	0	0	0	0	0	0	0	2	0	0	0	0	0	0	2	2	0	0	0	0	1
1_19568658	2	2	0	2	0	0	0	0	2	0	0	0	0	0	0	0	0	0	0	0	0	0	0	2	0	0	0	0	0	0	0	0	0	0	0	2	0	0	0	0	0	0	2	2	0	0	0	0	0
1_21391652	2	2	0	2	0	0	0	0	2	0	0	0	0	0	0	0	0	0	0	0	0	0	0	2	0	2	0	0	0	0	2	0	0	0	0	2	2	0	0	1	0	2	2	2	0	0	0	0	1
1_21994672	0	2	0	2	0	0	0	0	2	0	0	0	0	2	0	0	0	0	0	0	0	2	0	2	0	2	0	0	0	0	2	0	0	0	2	2	2	2	2	2	2	2	2	2	0	0	0	2	1
1_22318805	0	2	0	2	0	0	0	0	2	0	0	0	0	2	0	0	0	0	0	0	0	2	0	2	0	2	0	0	0	0	2	0	0	0	2	2	2	2	2	2	2	2	2	2	0	0	0	2	1
1_22890459	0	2	0	2	0	0	0	0	1	0	0	0	0	2	0	0	0	0	0	0	0	2	0	2	0	2	0	0	0	2	2	0	0	0	2	2	2	2	2	2	2	2	2	2	0	0	0	2	1
1_23395084	0	2	0	2	0	0	0	0	1	0	0	0	0	2	0	0	0	0	0	0	0	2	0	2	0	2	0	2	0	2	2	0	0	0	2	2	2	2	2	2	2	2	2	2	0	0	0	2	1
1_23699843	2	0	2	0	2	2	2	2	0	2	2	2	2	0	2	2	2	2	2	0	2	0	0	0	2	0	2	0	2	0	0	2	2	2	0	0	0	0	0	0	0	0	0	0	2	2	2	0	1
1_24271246	2	0	2	0	2	2	2	2	0	2	2	0	2	0	2	2	1	2	2	0	2	0	2	0	2	0	2	0	2	0	2	2	2	2	0	0	0	0	0	0	0	0	0	0	2	2	2	0	1
1_24386281	2	0	2	0	2	2	2	2	0	2	2	0	2	0	2	2	0	2	2	0	2	0	2	0	2	0	2	0	1	0	2	2	2	2	0	0	0	0	0	0	0	0	0	0	2	2	2	0	1
1_25573351	2	2	2	0	0	2	2	2	0	0	2	0	0	0	0	0	0	0	2	0	2	0	2	0	2	0	2	0	0	0	2	2	2	2	0	0	0	0	0	0	0	0	0	0	2	2	2	0	1
1_26130541	0	2	2	0	0	2	2	2	0	0	2	0	0	0	0	0	0	0	2	0	2	0	2	0	2	0	2	0	0	0	2	2	2	2	0	0	0	0	0	0	0	0	0	0	2	0	0	0	1
1_27163975	0	2	2	0	0	2	2	2	0	0	2	0	0	0	0	0	0	0	0	0	2	0	0	0	2	0	2	0	0	0	2	2	2	2	2	0	2	0	0	0	0	0	0	0	2	0	0	0	1
1_27500343	0	2	2	0	0	2	2	2	0	0	2	0	0	0	0	0	0	0	0	0	0	0	0	0	2	0	2	0	0	0	2	2	2	2	2	0	2	0	0	0	0	0	0	0	2	0	0	0	1
1_28297681	0	2	2	0	0	2	2	0	0	0	2	0	0	0	0	0	0	0	0	0	0	0	0	0	2	0	2	0	0	0	0	2	2	2	2	0	2	0	0	0	0	0	0	0	2	0	0	0	1
1_28734045	0	2	2	0	0	2	2	0	0	0	2	0	0	0	0	0	0	0	0	0	0	0	0	0	2	0	2	2	0	0	0	2	2	2	2	0	2	0	0	0	0	0	0	0	2	0	0	0	1
1_29722288	0	2	2	0	0	2	2	0	0	0	2	0	0	0	0	0	0	0	0	0	0	0	0	0	2	0	2	2	0	2	0	2	2	2	2	0	2	0	0	0	0	0	0	0	2	0	0	0	1
1_30134111	0	0	2	0	1	2	2	0	0	0	2	0	0	0	0	0	0	0	0	0	0	0	0	0	2	0	2	2	0	2	0	2	2	2	2	0	2	0	0	0	0	0	0	0	2	0	0	0	1
2_105236	0	2	0	0	0	2	0	0	0	0	0	0	2	2	2	2	2	0	2	2	0	2	0	0	0	0	0	0	0	0	0	0	2	0	0	2	0	0	0	0	0	0	0	0	0	2	0	1	1
2_2213462	0	2	2	0	0	0	0	0	0	0	0	0	0	0	0	0	0	0	2	0	2	2	0	0	0	0	0	0	0	0	0	0	0	0	0	0	0	0	0	0	0	0	0	0	0	2	0	0	1
2_4826280	0	0	0	0	0	0	0	0	0	0	0	0	0	0	0	0	0	0	2	0	2	2	0	0	0	0	0	0	0	0	0	0	0	0	0	0	0	0	0	0	0	0	0	0	0	2	0	0	1
2_5980584	0	0	0	0	0	0	0	0	0	0	0	0	0	0	0	0	0	0	2	0	2	2	0	0	0	0	0	0	0	0	0	0	0	0	0	0	0	0	0	0	0	0	0	0	0	2	0	0	1
2_6620062	0	0	0	0	0	0	0	0	0	0	0	0	0	0	0	0	0	0	2	0	2	2	0	0	0	0	0	0	0	0	0	0	0	0	0	0	0	0	0	0	0	0	0	0	0	0	0	0	1
2_7232297	0	0	0	0	0	0	0	0	0	0	0	0	0	0	0	0	0	0	2	0	0	2	0	0	0	0	0	0	0	0	0	0	0	0	0	0	0	0	0	0	0	0	0	0	0	0	0	0	1
2_8425602	0	0	0	0	0	0	0	0	0	0	0	0	0	0	0	0	0	0	2	0	0	0	0	0	0	0	0	0	0	0	0	0	0	0	0	0	0	0	0	0	0	0	0	0	0	0	2	0	1
2_8852237	0	0	0	0	0	0	0	0	0	0	0	0	0	0	0	0	0	0	2	0	0	0	0	0	0	0	0	0	0	0	0	0	0	0	0	0	0	0	0	0	0	0	0	0	0	0	1	0	1
2_9981557	0	0	0	0	0	0	0	0	0	0	0	0	0	0	0	0	0	0	2	0	0	0	0	0	0	0	0	0	0	0	0	0	0	0	0	0	0	0	0	0	0	0	0	0	0	0	2	0	1
2_11566718	0	0	0	0	0	0	0	0	0	0	0	0	0	0	0	0	0	0	2	0	0	0	0	0	0	0	0	0	0	0	0	0	0	0	0	0	0	0	0	0	0	0	0	0	0	0	2	0	1
2_12285634	0	2	0	2	0	0	0	0	2	0	0	0	0	0	0	0	0	0	2	2	2	0	0	0	0	0	0	0	0	0	0	0	0	0	0	0	0	0	0	0	0	0	0	0	2	0	2	0	1
2_12650745	0	2	0	2	0	0	0	0	2	0	0	0	0	0	0	0	0	0	2	2	2	0	0	0	0	0	0	0	0	0	0	0	0	0	0	0	0	0	0	0	0	0	0	0	0	0	0	0	1
2_13125572	0	2	0	2	0	0	0	0	2	0	0	0	0	0	0	0	0	0	2	2	2	2	0	0	0	0	0	0	0	0	0	0	0	0	0	0	0	0	0	0	0	0	0	0	0	0	0	0	1
2_14026779	0	2	0	2	0	0	0	0	2	0	0	0	0	0	0	0	0	0	0	2	2	2	0	0	0	0	0	0	0	0	0	0	0	0	0	0	0	0	0	0	0	0	0	0	0	0	0	0	1
2_14208495	0	2	0	2	0	0	0	0	2	0	0	0	0	0	0	0	0	0	0	2	0	2	0	0	0	0	0	0	0	0	0	0	0	0	0	0	0	0	0	0	0	0	0	0	0	0	0	0	1
2_15195268	0	2	0	2	0	0	0	0	2	0	0	0	0	0	0	0	0	0	0	2	0	2	0	0	0	0	0	0	0	0	0	0	0	0	0	0	0	2	0	2	2	2	0	0	0	0	0	1	1
2_16385811	0	2	0	2	0	0	0	0	2	0	0	0	0	0	0	0	0	0	0	2	0	2	0	0	0	0	0	0	0	0	0	0	0	0	0	0	0	0	2	2	2	2	0	2	0	0	0	0	1
2_16811161	0	2	0	2	0	0	0	0	2	0	0	0	0	0	0	0	0	0	0	2	0	2	2	2	2	2	0	0	2	2	0	0	0	0	0	0	0	0	2	2	0	2	0	2	0	0	0	0	1
2_16927693	0	2	0	2	0	0	0	0	1	0	0	0	0	0	0	0	0	0	0	2	0	2	0	2	2	2	0	0	2	2	0	0	0	0	0	0	0	0	2	2	0	2	0	2	0	0	0	0	1
2_17179798	0	2	0	0	0	0	0	0	0	0	0	0	0	0	0	0	0	0	0	2	0	2	0	2	2	2	0	0	2	2	0	0	0	0	0	0	0	0	2	2	0	2	0	2	0	0	0	0	1
2_17789107	0	2	2	0	2	0	0	0	0	0	0	0	0	0	0	0	0	0	0	2	0	2	0	2	2	2	0	0	2	0	0	0	0	0	0	0	0	0	2	2	0	2	0	2	0	0	0	0	1
2_18991508	0	2	2	0	2	2	0	0	1	2	0	2	0	0	0	0	1	0	0	2	0	2	0	2	2	2	0	0	0	0	0	0	0	0	0	0	0	0	2	2	0	2	0	2	0	0	0	1	1
2_19204900	1	2	2	0	2	2	0	0	1	1	0	2	0	0	0	1	1	0	0	2	1	0	0	2	2	2	0	0	0	0	0	0	0	0	0	0	0	0	2	0	0	2	0	2	0	0	0	1	1
3_251628	2	2	0	2	0	0	2	2	1	0	0	0	0	0	0	0	0	0	2	2	2	2	1	2	0	2	0	0	2	2	0	0	0	0	0	0	0	0	0	0	0	0	0	0	0	0	0	0	1
3_849706	2	2	0	2	0	0	2	2	2	0	0	0	0	0	0	0	0	0	2	2	2	2	2	2	0	2	0	0	2	2	0	0	0	0	0	0	0	0	0	0	0	0	0	0	0	0	0	0	1
3_1442067	2	2	0	0	0	0	2	2	0	0	0	0	0	0	0	0	0	0	2	2	2	2	2	2	0	2	0	0	2	2	0	0	0	0	0	0	0	0	0	0	0	0	0	0	0	0	0	0	1
3_1883603	2	2	0	0	0	0	2	2	0	0	0	0	0	0	0	0	0	0	2	2	2	2	2	2	0	2	0	0	2	2	0	0	0	0	0	0	0	0	0	0	0	0	0	0	0	0	0	0	1
3_3271939	2	2	0	0	0	0	2	2	0	0	0	0	0	0	0	0	0	0	2	2	2	2	2	2	0	2	0	0	2	2	0	0	0	0	0	0	0	0	0	0	0	0	0	0	0	0	0	0	1
3_4160087	2	2	0	0	0	0	2	2	0	0	0	0	0	2	0	2	2	0	2	2	2	2	2	2	0	0	0	0	2	2	0	0	0	0	0	0	0	0	0	0	0	0	0	0	0	0	0	0	1
3_4817528	2	2	0	0	0	2	2	2	0	0	0	0	0	2	0	2	2	0	2	2	2	2	2	2	0	0	0	0	2	2	0	0	0	0	0	0	0	0	0	0	0	0	0	0	0	0	0	0	1
3_5551187	2	2	0	0	0	2	0	0	0	0	0	0	0	2	0	2	2	0	2	2	2	2	2	2	0	0	0	0	2	2	0	0	0	0	0	0	0	0	0	0	0	0	0	0	0	0	0	0	1
3_7205227	2	2	0	2	0	2	0	0	0	0	0	0	0	2	0	2	0	0	2	2	2	2	2	2	0	0	0	0	2	2	0	0	0	0	0	0	0	0	0	0	0	0	0	0	0	0	0	0	1
3_7383848	2	2	0	2	0	2	0	0	0	0	0	0	0	0	0	2	0	0	2	2	2	2	2	2	0	0	0	0	2	2	0	0	0	0	0	0	0	0	0	0	0	0	0	0	0	0	0	0	1
3_7600790	2	2	0	2	0	2	0	0	0	0	0	0	0	0	0	2	0	0	2	2	2	0	2	2	0	0	0	0	2	2	0	0	0	0	0	0	0	0	0	0	0	0	0	0	0	0	0	0	1
3_7932147	2	2	0	2	0	2	0	0	0	0	0	0	0	0	0	2	0	0	2	0	2	0	2	2	0	0	0	0	2	2	0	0	0	0	0	0	0	0	0	0	0	0	0	0	0	0	0	0	1
3_8185972	2	2	0	2	0	2	0	0	0	0	0	0	0	0	0	2	0	0	2	0	2	0	2	0	1	0	0	0	2	2	0	0	0	0	0	0	0	0	0	0	0	0	0	0	0	0	0	2	1
3_8816904	2	2	0	1	0	2	0	0	2	0	0	0	0	0	0	2	0	0	2	0	2	0	2	0	2	0	2	0	2	2	0	0	0	0	0	0	0	0	0	0	0	0	0	0	0	0	0	2	1
3_9202146	2	2	0	1	0	2	0	0	2	0	0	0	0	0	0	2	0	0	2	0	2	0	2	0	2	0	2	0	2	2	0	0	0	0	0	0	0	0	0	0	0	0	0	0	0	2	0	2	1
3_9377864	2	2	2	0	0	2	0	0	0	0	0	0	0	0	0	2	0	0	2	0	2	0	2	0	2	0	2	0	2	2	0	0	0	0	0	0	0	0	0	0	0	0	0	0	0	2	0	2	1
3_9657983	2	2	2	0	0	2	0	0	0	0	0	0	0	0	0	2	0	0	2	0	2	0	2	0	2	0	2	0	2	2	0	2	0	0	2	0	2	0	0	0	0	0	0	0	0	2	0	2	1
3_10346113	1	2	2	2	0	2	0	0	2	0	0	0	1	0	2	2	0	0	2	0	2	0	2	0	2	0	2	0	0	2	0	2	0	0	2	0	2	0	0	0	0	0	0	0	0	2	0	2	1
3_11273605	0	0	0	0	0	0	0	0	0	0	0	0	2	0	2	2	2	0	2	0	2	0	2	0	2	0	2	2	2	0	0	2	0	0	2	0	2	0	0	0	0	0	0	0	0	2	0	2	1
3_11676122	0	0	0	0	0	0	0	0	0	0	0	0	2	0	2	2	2	0	2	0	2	0	2	0	2	0	2	2	2	0	0	2	0	0	2	2	2	0	0	0	0	0	0	0	0	2	0	2	1
3_15809039	0	0	0	0	0	0	0	0	0	0	0	0	2	0	2	2	2	0	2	0	2	0	2	0	2	0	2	2	2	0	0	2	0	0	2	2	2	0	0	0	0	0	0	0	0	0	0	2	1
3_16092857	0	0	0	0	0	0	0	0	0	0	0	0	2	0	2	0	2	0	2	0	2	0	2	0	2	0	2	2	2	0	0	2	0	0	2	2	2	0	0	0	0	0	0	0	0	0	0	2	1
3_16755037	0	0	0	0	0	0	0	0	0	0	0	0	2	0	2	0	2	0	2	0	0	0	2	0	2	0	2	2	2	0	0	2	0	2	2	2	2	0	0	0	0	0	0	0	0	0	0	2	1
3_17340330	0	0	0	0	0	0	0	0	0	0	0	0	2	0	2	2	2	0	2	0	0	0	2	0	2	0	2	2	2	0	0	2	0	2	2	2	2	0	0	0	0	0	0	0	0	0	0	2	1
3_18197359	0	0	0	0	0	0	0	0	0	0	0	0	2	0	2	2	2	0	2	0	0	0	2	0	2	0	2	2	2	2	0	2	0	2	2	2	2	0	0	0	0	0	0	0	0	0	0	2	1
3_18520238	0	0	0	0	0	0	0	0	0	0	0	0	2	0	2	2	2	0	2	2	0	0	2	0	2	0	2	2	2	2	0	2	0	2	2	2	2	0	0	0	0	0	0	0	0	0	0	2	1
3_21228655	0	0	0	0	0	0	0	0	0	0	0	0	2	0	2	2	2	0	2	2	0	0	2	2	2	2	2	2	0	2	0	2	0	2	2	2	0	0	0	0	0	0	0	0	0	0	0	2	1
3_22610533	0	0	0	0	0	0	0	0	0	0	0	0	0	0	0	0	0	0	2	2	0	0	1	2	2	2	2	2	0	2	0	2	2	2	2	2	0	2	0	0	2	0	0	2	0	0	0	2	1
3_23237405	0	0	0	0	0	0	0	0	0	0	0	0	0	0	0	0	0	0	2	2	0	0	0	2	2	2	2	2	0	2	0	2	2	2	2	2	0	2	0	0	2	0	0	2	0	0	0	2	1
3_23437948	0	0	0	0	1	0	0	0	0	0	0	0	0	0	0	1	1	0	2	2	0	0	0	2	2	2	2	2	0	2	0	0	0	0	0	0	0	2	0	0	2	0	0	2	0	0	0	2	1
4_855491	0	0	0	0	0	0	0	0	0	0	0	0	0	0	0	0	0	0	0	0	0	0	0	0	0	0	0	0	0	0	0	2	2	2	2	2	0	0	0	0	0	0	0	0	0	2	0	0	1
4_3620330	0	0	0	0	0	0	0	0	0	0	0	0	0	0	0	0	0	0	0	0	0	0	0	0	0	0	0	0	0	0	0	2	2	2	2	2	0	0	0	0	0	0	0	0	0	2	0	0	1
4_4869495	0	0	0	0	0	0	0	0	0	0	0	0	0	0	0	0	0	0	0	0	0	0	0	0	0	0	0	0	0	0	2	2	2	2	2	2	0	0	0	0	0	0	0	0	0	2	0	0	0
4_5377795	0	0	0	0	0	0	0	0	0	0	0	0	0	0	0	0	0	0	0	0	0	0	0	0	0	0	0	0	0	0	2	2	2	2	2	2	0	0	0	0	0	0	0	0	0	2	0	0	1
4_5811561	0	0	0	0	0	0	0	0	0	0	0	0	0	0	0	0	0	0	0	0	0	0	0	0	0	0	0	0	0	0	2	2	2	2	0	2	0	2	0	2	2	0	2	2	0	0	0	0	0
4_6575211	0	0	0	0	0	0	0	0	0	0	0	0	0	0	0	0	0	0	0	0	0	0	0	0	0	0	0	0	0	0	0	0	0	0	0	0	0	2	0	2	2	0	2	2	0	0	0	0	1
4_8556434	0	0	0	0	0	0	0	0	0	0	0	0	0	0	0	0	0	0	0	0	0	0	0	0	0	0	0	0	0	0	0	0	0	0	0	0	0	2	0	2	2	0	2	2	0	0	0	0	1
4_9390932	0	0	0	0	0	0	0	0	0	0	0	0	0	0	0	0	0	0	0	0	0	0	0	0	0	0	0	0	0	0	0	0	0	0	0	0	0	2	0	2	2	0	2	2	0	0	0	0	0
4_11739311	0	0	0	0	0	0	0	0	0	0	0	0	0	0	0	0	0	0	0	0	0	0	0	0	0	0	0	0	0	0	0	0	0	0	0	0	0	2	0	2	2	0	2	2	0	0	0	0	1
4_11897792	0	0	0	0	0	0	0	0	0	0	0	0	0	0	0	0	0	0	0	0	0	0	0	0	0	0	0	0	0	0	0	0	0	0	0	0	0	2	0	2	2	0	2	2	0	0	0	0	1
4_12126692	0	0	0	0	0	0	0	0	0	0	0	0	0	0	0	0	0	0	0	0	0	0	0	0	0	0	0	0	0	0	0	0	0	0	0	0	0	2	0	2	2	0	2	2	0	0	0	0	1
4_14916294	0	0	2	2	2	0	0	0	2	0	0	0	0	0	0	0	0	0	0	0	0	0	0	0	0	0	0	0	0	0	0	0	0	0	0	0	0	2	0	2	2	0	2	2	0	0	0	0	1
4_15598786	0	0	2	2	2	0	0	0	2	0	0	0	0	0	0	2	2	0	0	0	0	0	0	0	0	0	0	0	0	0	0	0	0	0	0	0	0	2	0	2	2	0	2	2	0	0	0	0	1
4_15729378	0	0	2	2	2	0	0	0	2	0	0	0	0	0	0	2	2	0	0	0	0	0	0	0	0	0	0	0	0	0	0	0	0	0	0	0	0	0	0	0	0	0	0	0	0	0	0	0	1
4_16304228	0	0	2	2	2	0	0	0	2	0	0	0	0	0	2	2	2	0	0	0	0	0	0	0	0	0	0	0	0	0	0	0	0	0	0	0	0	0	0	0	0	0	0	0	0	0	0	0	1
4_18295699	0	0	2	2	2	0	0	0	2	0	0	0	0	2	2	2	2	2	0	0	0	0	0	0	0	0	0	0	0	0	2	2	0	0	0	0	2	0	0	0	0	0	0	0	0	0	0	0	1
5_1335242	2	0	0	0	0	2	0	0	0	0	0	0	0	0	0	0	0	0	0	0	0	0	2	2	2	2	0	2	2	0	2	0	0	2	2	0	2	0	0	0	0	0	0	0	0	0	0	0	1
5_1477334	2	0	0	0	0	2	0	0	0	0	0	0	0	0	0	0	0	0	0	0	0	0	2	2	2	2	0	2	2	0	2	0	0	2	2	0	2	0	0	0	0	0	0	0	0	0	0	0	1
5_2194237	2	0	2	0	0	2	0	0	0	0	0	0	0	0	0	0	0	0	0	0	0	0	2	2	2	2	0	2	2	0	2	0	0	2	2	0	2	0	0	0	0	0	0	0	0	0	0	0	1
5_3588597	2	0	2	0	0	2	0	0	0	0	0	0	0	0	0	0	0	0	0	0	0	0	2	2	2	2	0	2	2	0	2	0	0	2	2	0	2	0	0	0	0	0	0	0	0	0	0	0	1
5_3746023	2	0	2	0	0	2	0	0	0	0	0	0	0	0	0	0	0	0	0	0	0	0	2	2	2	2	0	2	2	0	2	0	0	2	2	0	2	0	0	0	0	0	0	0	0	0	0	0	1
5_4702566	2	0	2	0	0	2	0	0	0	0	0	0	0	0	0	0	0	0	0	0	0	0	2	2	2	2	0	2	2	0	2	0	0	2	2	0	2	0	0	0	0	0	0	0	0	0	0	0	1
5_5034860	2	0	2	0	0	2	0	0	0	0	0	0	0	0	0	0	0	0	0	0	0	0	2	2	2	2	0	2	2	0	2	0	2	2	2	0	2	0	0	0	0	0	0	0	0	0	0	0	1
5_5519809	2	0	2	0	0	2	0	0	0	0	0	0	0	0	0	0	0	0	0	0	0	0	2	2	2	2	0	2	2	0	2	0	2	2	2	0	2	0	0	0	0	0	0	0	0	0	0	0	1
5_6621695	2	0	2	0	0	2	0	0	0	0	0	0	0	0	0	0	0	0	0	0	0	0	2	2	2	2	0	2	2	0	0	0	0	0	1	0	0	0	0	0	0	0	0	0	0	0	0	0	1
5_7314430	2	0	2	0	0	2	2	0	0	0	0	2	0	0	0	0	0	0	0	0	0	0	2	2	2	2	0	2	2	0	0	0	0	0	0	0	0	0	0	0	0	0	0	0	0	0	0	0	1
5_7486770	2	0	2	0	0	2	2	0	0	0	0	2	0	0	0	0	0	0	0	0	0	0	2	2	2	2	0	2	2	0	0	0	0	0	0	0	0	0	0	0	0	0	0	0	0	0	0	0	1
5_8138474	2	2	0	0	0	2	2	0	0	0	0	2	0	0	0	0	0	0	0	0	0	0	2	2	2	2	0	2	2	0	0	0	0	0	0	0	0	0	0	0	0	0	0	0	0	0	0	0	1
5_8182814	0	2	0	0	0	2	2	0	0	0	0	2	0	0	0	0	0	0	0	0	0	0	2	2	2	2	0	2	2	0	0	0	0	0	0	0	0	0	0	0	0	0	0	0	0	0	0	0	1
5_9524947	0	2	0	0	0	0	2	0	0	0	0	2	0	0	0	0	0	0	0	0	0	0	2	2	2	2	0	2	2	2	0	0	0	0	0	0	0	0	0	0	0	0	0	0	0	0	0	0	1
5_11364437	0	2	0	0	0	0	2	0	0	0	0	2	0	0	0	0	0	0	0	0	0	0	2	2	0	2	0	2	2	2	0	0	0	0	0	0	0	0	0	0	0	0	0	0	0	0	0	0	1
5_13864664	0	2	0	0	0	0	2	0	0	0	0	2	0	0	0	0	0	0	0	0	0	0	2	2	0	2	0	2	2	0	0	0	0	0	0	0	0	0	0	0	0	0	0	0	0	0	0	0	1
5_15817199	0	0	0	0	0	0	2	0	0	0	0	2	0	0	0	0	0	0	0	0	0	0	2	2	2	2	0	2	2	0	0	0	0	0	0	0	0	0	0	0	0	0	0	0	0	0	0	0	1
5_16496349	0	0	0	0	0	0	2	0	0	0	0	2	0	0	0	0	0	0	0	0	0	0	2	2	2	2	0	0	0	0	0	0	0	0	0	0	0	0	0	0	0	0	0	0	0	2	2	0	1
5_17755357	0	0	0	0	0	0	2	0	0	0	0	2	0	0	0	0	0	0	0	0	0	0	2	2	2	2	0	0	2	0	0	0	0	0	0	0	0	0	0	0	0	0	0	0	0	2	2	0	1
5_20473965	0	0	0	0	0	0	2	0	0	0	0	2	0	0	0	0	0	0	0	0	0	0	2	2	2	2	0	0	2	2	0	0	0	0	0	0	0	0	0	0	0	0	0	0	0	2	2	0	1
5_21141781	0	0	0	0	0	0	2	0	0	0	0	2	0	0	0	0	0	0	0	0	0	0	0	0	0	0	0	0	0	0	0	0	0	0	0	0	0	0	0	0	0	0	0	0	0	2	2	0	1
5_21952042	0	0	0	0	0	0	2	0	0	0	0	2	0	0	0	0	0	0	0	0	0	0	0	0	0	0	0	0	0	0	0	0	0	0	0	0	0	1	2	2	2	2	0	2	0	2	2	0	1
5_22095190	0	0	0	0	0	0	2	0	0	0	0	2	0	0	0	0	0	0	0	0	0	0	0	0	0	0	0	0	0	0	0	0	0	0	0	0	0	2	0	2	2	2	0	2	0	2	2	0	1
5_24941285	0	0	0	0	0	0	2	0	0	2	2	2	0	0	0	0	0	0	0	0	0	0	0	0	0	0	0	0	0	0	0	0	0	0	0	0	0	2	0	2	2	2	0	0	0	2	2	0	1
5_25513597	0	0	0	0	0	0	2	0	0	2	2	2	0	0	0	0	0	0	0	0	0	0	0	0	0	0	0	0	0	0	0	0	0	0	0	0	0	2	0	2	2	2	0	0	0	2	2	0	1
5_25754948	2	0	2	0	0	0	2	0	0	2	2	2	0	0	0	0	0	1	0	0	0	0	0	0	0	0	0	0	0	0	0	0	0	0	0	0	0	2	0	2	2	2	0	0	0	2	2	0	1
5_26368021	2	0	2	0	0	0	2	0	0	2	2	2	2	2	0	2	1	2	0	0	0	0	0	0	0	0	0	0	0	0	0	0	0	0	0	0	0	2	0	2	2	2	0	2	0	2	2	0	1
5_26419627	2	0	2	0	0	0	2	0	0	2	2	2	2	2	0	0	2	2	0	0	0	0	0	0	0	0	0	0	0	0	0	0	0	0	0	0	0	2	0	2	2	2	0	2	0	2	2	0	1
5_26836045	2	0	2	0	0	0	2	0	1	2	2	2	2	2	0	0	2	2	0	0	0	0	0	0	0	0	0	0	0	0	0	0	0	0	0	0	0	2	0	2	2	2	0	2	0	2	2	0	1
[truncated: 22 more columns]

## Sheet: Ler x Ws2 Traits
RIL	Period_June	Phase_June	Period_July	Phase_July	Period_Sept	Phase_Sept	Cauline_Leaf_Number	Rosette_Leaf_Number	Cauline_Branch_Number	Rosette_Branch_Number	Rosette_Meristem_Fate
95	20.2573	18.6811	27.7901	18.9861	25.0091	9.61568	2.63887	12.5513	2.90411	5.16527	0.498468
96	20.4439	19.9112	19.7664	17.8998	25.2227	11.0724	2.60776	9.28181	2.45698	7.18825	0.747692
97	20.3246	21.2002	23.2206	18.6064	25.2971	10.706	2.69816	9.14709	2.91194	5.0065	0.580989
98	19.8508	18.5367	19.6846	19.5175	23.9581	10.7404	3.57986	10.1455	3.57046	5.83747	0.591492
99	19.7754	20.0665	22.4222	18.4546	24.2829	10.8634	3.90798	11.0018	3.59853	4.69034	0.548994
100	19.4219	19.0221	24.5857	14.4413	22.9688	9.70753	2.98947	7.35714	2.92511	3.84296	0.603615
101	19.7497	17.8179	19.8797	18.5201	24.6735	10.6217	1.89731	12.4286	1.93216	6.30959	0.536076
102	19.6887	18.6539	18.9702	17.9635	25.481	11.5395	2.14346	11.1053	2.66411	6.05996	0.648516
103	20.0515	19.2895	19.0536	18.6078	24.1028	10.3148	2.48784	10.0832	2.7887	5.28334	0.594769
104	19.0126	19.1651	21.062	19.2618	24.4071	11.0699	2.13375	12	2.35508	4.99194	0.476388
105	19.3657	19.1294	21.9084	20.1975	24.3149	10.1023	2.41103	9.31019	2.05647	5.04289	0.558388
106	19.3776	19.5259	25.5498	19.9886	24.3629	10.3846	2.80422	10.2138	3.02337	5.77667	0.559606
107	19.7076	19.982	20.8769	18.3028	25.8601	12.5045	3.02005	11.8201	2.94073	5.75638	0.526802
108	19.2604	18.4347	21.7531	19.2439	25.0538	11.0484	3.08503	12.5867	3.43202	5.63506	0.493111
109	18.9236	18.8964	23.4889	19.4918	26.5388	10.0779	3.37513	10.3587	3.07557	5.4449	0.565561
110	19.0505	17.8431	23.7261	19.034	25.8334	10.8066	3.28214	13.9638	2.91491	5.12809	0.412726
111	19.4546	19.0641	20.7752	15.7232	24.4643	9.84464	3.0028	12.9286	2.75518	5.31806	0.458913
112	19.3712	18.8945	20.4497	15.208	24.9472	10.6572	3.10175	8.35877	3.03532	4.90896	0.591517
113	19.1725	16.7843	21.2908	18.4943	24.0926	10.7455	2.40983	9.28571	2.52364	6.02977	0.710928
114	20.2162	20.1865	21.1179	19.2038	24.2393	10.0075	2.9803	10.9894	2.96556	6.25677	0.605331
115	20.4284	19.0995	19.2777	18.8055	24.1122	10.8414	2.50589	11.1607	2.13752	6.18418	0.602917
116	22.3357	19.3247	19.502	19.4828	24.1143	10.6048	2.94545	11.3716	3.02805	5.75526	0.499806
117	19.0309	17.2764	18.6011	18.0139	24.5369	9.52336	2.11551	9.57143	2.05306	5.24852	0.592391
118	20.1552	19.3765	19.5086	20.5412	23.6843	11.5451	2.52745	8.28303	2.23473	6.73862	0.764686
119	19.6376	19.7757	21.2518	18.5339	22.8114	12.816	2.35173	6.39755	2.44444	6.6467	0.783631
120	19.2425	17.7255	18.983	21.5639	23.6698	10.322	2.2709	8.40602	2.08874	5.25405	0.65928
121	19.8017	19.7315	24.2303	18.8015	22.8343	9.63657	2.30138	8.45196	2.43302	5.52562	0.640637
122	19.2464	19.2694	21.6422	18.9967	23.2422	9.9542	2.16024	6.42857	1.88657	5.27444	0.836508
123	19.5739	17.9089	19.034	18.2681	24.4868	10.5468	2.63651	8.85714	2.37202	6.04799	0.707857
124	21.0678	18.4417	19.4264	18.3833	22.865	14.669	2.41325	12.1205	2.95286	7.64285	0.590703
125	21.7654	17.6407	27.993	19.7789	23.9885	10.8578	2.30011	9.56558	2.71854	5.30483	0.616343
126	19.4694	19.3272	23.3539	19.3921	23.2371	9.80743	3.08957	9.69905	2.98403	5.37468	0.547169
127	20.1489	19.8202	20.3378	19.6731	23.65	10.3291	2.44096	8.45352	2.62636	5.02428	0.635651
128	18.5811	18.3889	26.6798	20.3329	24.2852	11.5537	2.70982	8	2.53957	4.96981	0.643707
129	20.574	23.2555	22.7288	16.2504	24.1428	10.5103	2.58795	9.6122	2.53479	5.63578	0.618592
130	.	.	.	.	.	.	.	.	.	.	.
131	19.2624	19.878	24.0072	18.4318	24.2152	9.75834	1.83292	9.55367	2.0401	5.90473	0.609586
132	19.2284	18.3612	23.299	19.3755	23.2222	20.0929	2.94441	9.96374	3.13545	5.69756	0.650524
133	19.3269	19.7643	23.4727	19.5123	23.9585	10.0618	2.68137	9.16273	2.85443	5.53932	0.654149
134	18.8515	18.4862	27.6317	20.763	23.7469	11.1862	2.80435	10.0407	2.84396	5.91022	0.633877
135	18.9927	18.5385	22.9741	20.5788	22.9814	10.1291	2.51737	13.2143	3.00157	5.56374	0.446624
136	19.1807	17.9566	23.9084	20.6947	23.4045	10.5139	2.99946	10.8063	3.78187	4.93619	0.495918
137	19.2306	18.0646	19.1204	19.6596	24.3686	11.9063	2.00603	8.92857	1.94043	4.93679	0.602953
138	.	.	20.593	10.0809	.	.	2.54718	9.5	2.56916	6.11954	0.628419
139	19.925	19.1787	29.6824	21.9999	23.17	9.091	2.04788	8.13123	1.82916	4.86024	0.622169
140	18.7332	17.9117	22.9419	20.5502	22.0319	10.1893	2.46805	11.4724	2.21139	5.34256	0.481293
141	18.6082	17.8946	28.9814	20.4625	24.8143	10.3177	2.48757	9.55337	2.37307	5.15705	0.537333
142	20.7175	18.2626	23.7939	19.8986	24.5521	11.404	2.91068	11.0599	3.40684	6.52852	0.611459
143	18.9748	17.7293	23.5681	18.945	23.2974	23.1228	2.24936	7.50564	2.21511	4.77576	0.695344
144	19.4501	18.8529	20.8717	20.014	23.4105	10.295	2.51815	7.34767	2.53666	4.38695	0.685318
145	19.4037	18.5867	27.7464	18.8131	22.9602	9.85925	2.59653	10.6271	2.68002	7.25722	0.662236
146	19.4313	17.8968	18.4515	16.9023	23.8908	10.0154	1.97971	10.4533	2.21329	5.85715	0.577795
147	.	.	19.218	18.0213	23.7243	10.3333	2.39521	10.2857	2.56726	6.8586	0.735065
148	20.4544	18.0541	18.3593	18.4661	23.4266	10.4978	2.65875	9.13963	3.42584	5.63858	0.691742
149	.	.	.	.	.	.	.	.	.	.	.
150	19.0738	19.1896	27.0406	20.8027	23.9443	12.0787	2.94942	11.505	4.14712	5.65461	0.487216
151	19.6918	20.5938	28.3451	20.7871	24.3793	9.5853	3.00646	10.2073	3.07927	5.63664	0.572247
152	19.3983	19.6937	20.526	17.7845	24.339	15.8454	2.27457	10.7017	2.6114	5.12414	0.494838
153	18.9019	19.6905	25.7564	14.1607	24.8339	10.6025	3.23135	10.656	3.52423	5.29387	0.544543
154	18.8388	18.7456	27.8541	21.7946	24.54	11.216	2.80234	10.7143	2.63471	5.61997	0.576956
155	19.641	20.2562	28.6731	20.9616	25.6857	12.4563	3.02999	12.2143	3.08944	5.11291	0.447303
156	19.8268	20.0271	20.2136	19.6596	24.3852	11.3225	2.189	10.2857	1.83794	5.92159	0.622644
157	20.4407	20.3492	20.8493	18.3646	25.3766	9.93581	1.86178	8.2788	1.75152	5.58574	0.688314
158	19.3287	18.9529	20.8768	19.0615	23.6725	9.96584	2.64105	8.38961	2.53076	6.13888	0.776952
159	21.5752	19.7577	19.0688	19.7781	23.8914	9.24129	2.40686	8.07143	2.5828	4.96883	0.625696
160	18.892	18.777	23.0324	19.5867	24.6478	11.846	2.72752	10.7868	2.46914	5.76701	0.572522
161	21.7718	19.7221	24.1184	20.0842	23.8958	13.1806	2.67442	10.2857	2.76914	4.78571	0.479879
162	19.2802	19.5384	18.3557	18.5579	22.5502	16.1262	2.04582	7.86106	2.1036	4.96734	0.666571
163	20.7691	18.6989	.	.	23.8125	22.5833	.	.	.	.	.
164	19.0435	18.8759	21.353	18.7937	25.391	16.1386	2.08778	10.2073	2.2933	4.65971	0.541839
165	19.2252	19.5322	23.3399	18.5347	23.2657	21.8874	2.24151	8.71429	2.75586	5.52962	0.739138
